1 **Germ plasm localisation dynamics mark distinct phases of**  
2 **transcriptional and post-transcriptional regulation control in**  
3 **primordial germ cells**

4

5 Fabio M. D'Orazio<sup>1,2</sup>, Piotr Balwierz<sup>1,2</sup>, Yixuan Guo<sup>3</sup>, Benjamín Hernández-Rodríguez<sup>4</sup>,  
6 Aleksandra Jasiulewicz<sup>1</sup>, Juan M. Vaquerizas<sup>4</sup>, Bradley Cairns<sup>3</sup>, Boris Lenhard<sup>2</sup> and Ferenc  
7 Müller<sup>1</sup>

8

9 <sup>1</sup>Institute of Cancer and Genomics Sciences, College of Medical and Dental Sciences, University of  
10 Birmingham, Birmingham, UK.

11 <sup>2</sup>MRC London Institute of Medical Sciences and Faculty of Medicine, Imperial College, London, UK

12 <sup>3</sup>Department of Oncological Sciences and Huntsman Cancer Institute, Howard Hughes Medical  
13 Institute, University of Utah School of Medicine, Salt Lake City, UT, 84112, USA

14 <sup>4</sup>Max Planck Institute for Molecular Biomedicine, Roentgenstrasse 20, 48149 Muenster, Germany.

15

16 Correspondence to: [f.mueller@bham.ac.uk](mailto:f.mueller@bham.ac.uk), [b.lenhard@imperial.ac.uk](mailto:b.lenhard@imperial.ac.uk)

17

18 **SUMMARY**

19 In many animal models, primordial germ cell (PGC) development depends on maternally-  
20 deposited germ plasm to avoid somatic cell fate. Here, we show that PGCs respond to  
21 regulatory information from the germ plasm in two distinct phases and mechanisms in  
22 zebrafish. We show that PGCs commence zygotic genome activation together with the  
23 rest of the embryo with no demonstrable differences in transcriptional and chromatin  
24 accessibility levels. Thus, cytoplasmic germ plasm determinants only affect post-  
25 transcriptional stabilisation of RNAs to diverge transcriptome from somatic cells, which,  
26 unexpectedly, also activate germ cell-specific genes. Perinuclear relocalisation of germ  
27 plasm is coupled to dramatic divergence in chromatin opening and transcriptome from  
28 somatic cells characterised by PGC-specific chromatin topology. Furthermore, we reveal  
29 Tdrd7, regulator of germ plasm localisation, as crucial determinant of germ fate  
30 acquisition.

## 31 INTRODUCTION

32 In sexually-reproducing organisms, the germ line ensures that parental genetic  
33 information is passed on from one generation to the next. The commitment of the  
34 embryonic germ line follows unique steps (Strome and Updike, 2015): in metazoans, the  
35 germ fate can be either oocyte-inherited (predetermined) (Eddy, 1975; Williamson and  
36 Lehmann, 1996) or zygotically-triggered (induced) (Lawson et al., 1999; Ying et al.,  
37 2001). In mammals, germ cells are generated during gastrulation in response to  
38 extracellular signals from the surrounding embryonic cells (Ying et al., 2001). On the  
39 other hand, most non-mammalian model organisms, such as *C. elegans*, *D. melanogaster*,  
40 *X. laevis* and *D. rerio*, require maternal transmission of germ cell-specific factors, which  
41 aggregate in a self-containing structure known as germ plasm and distribute into  
42 primordial germ cells (Eddy, 1975; Seydoux and Braun, 2006). The germ plasm has been  
43 shown to be sufficient and necessary to trigger the germ fate (Gross-Thebing et al., 2017;  
44 Tada et al., 2012). The function of the germ plasm is to avoid somatic lineage  
45 differentiation of the host cells by at least two mechanisms. Firstly, germ plasm  
46 components post-transcriptionally regulate maternal RNA stability and translation  
47 (Charlesworth et al., 2006; Iguchi et al., 2006; Nakamura et al., 2004; Siddall et al., 2006;  
48 Wilhelm et al., 2003) while they are cleared in the rest of the embryo (Giraldez et al.,  
49 2006; Mishima et al., 2006). Also, germ plasm-specific factors, such as Nanos, Dazl and  
50 Dead-end (Dnd) function in RNA processing pathways and are indispensable for PGC  
51 development (Köprunner et al., 2001; Oulhen et al., 2017; Suzuki et al., 2010). Dnd,  
52 induces selective translation of mRNAs by liberating them from micro-RNA (miRNA)  
53 inhibition (Kedde et al., 2007), while the RNA-binding-Protein (RBP) DAZL was found to  
54 inhibit the translation of several mRNA involved in pluripotency, somatic differentiation  
55 and apoptosis in murine PGCs (Chen et al., 2014). Secondly, germ plasm components have  
56 been associated with block or delay of Zygotic Genome Activation (ZGA) of the hosting  
57 cell and proposed as key factors for avoiding somatic cell fate. In *C. elegans* and *D.*  
58 *melanogaster*, the germ plasm proteins PIE-1 and Pgc delay ZGA in the PGCs, allowing the  
59 disengagement between the germ and the somatic lines (Batchelder et al., 1999; Mello et  
60 al., 1996; Strome and Updike, 2015).

61 In contrast to the extensive, genome-wide DNA demethylation observed in migrating  
62 mammalian PGCs (Bender et al., 2004; Gkoutela et al., 2015; Guo et al., 2015; Tang et al.,  
63 2015) reprogramming of DNA methylation has not been seen in zebrafish (Ortega-

64 Recalde et al., 2019; Skvortsova et al., 2019). On the other hand, epigenetic regulators  
65 maternally transmitted via germ granules have been implicated in germ fate acquisition  
66 (Gaydos et al., 2012; Rechtsteiner et al., 2010; Strome et al., 2014), suggesting that  
67 alternative mechanisms of germ plasm-mediated transcriptional regulation may exist.  
68 In this study, we aimed to characterise the potential roles of the germ plasm during PGC  
69 formation. We hypothesized that the distinct localisation patterns of the germ plasm  
70 before and during PGC migration may represent distinguishable cytoplasmic and nuclear  
71 functions in PGC specification. We profiled transcriptome, open chromatin and DNA  
72 methylome of developing PGCs at high temporal resolution and discovered two distinct  
73 phases of PGC specification during zebrafish embryogenesis. Consequently, we suggest  
74 that the first function of the germ plasm is solely cytoplasmic and does not influence  
75 transcription or chromatin landscape of the pre-migrating PGCs. However, the second  
76 phase of germ cell formation requires chromatin reorganisation, resulting in extensive  
77 transcriptional changes that temporally coincide with the association between germ  
78 plasm and nuclear membrane. By systematic identification of open chromatin and  
79 subsequent prediction of cis-regulatory elements, we show that putative enhancers in  
80 proximity of developmental genes remain compacted during PGC specification, resulting  
81 in the lack of somatic gene expression. Moreover, predicted PGC-specific regulatory  
82 elements appear to be distinctly proximal to the Transcription Start Site (TSS), in sharp  
83 contrast to the somatic-specific elements, which spread more distally. The observed  
84 chromatin organisation of regulatory elements may underlie unique DNA topology  
85 contributing to repression of somatic lineage differentiation. Finally, by inhibiting the  
86 translation of Tudor Domain 7a (Tdrd7a), which leads to disruption of germ plasm  
87 perinuclear localisation, we demonstrate the requirement of this germ cell determinant  
88 in defining germ cell-specific open chromatin and transcriptional landscape.

## 89 RESULTS

### 90 **Characterisation of primordial germ cell transcriptome before and during** 91 **migration**

92 In order to investigate the roles of germ granules, we aimed to characterise the early  
93 phases of germ line development via extensive profiling of epigenetic and transcriptional  
94 features. For this reason, we focused on the first day of zebrafish embryogenesis, when  
95 the PGCs show the most dynamic and active behaviour. The Tg(Buc-GFP) line of *D. rerio*  
96 with fluorescently-marked germ plasm (Riemer et al., 2015) was utilised to isolate PGCs  
97 and non-fluorescent somatic cells by FACS (Supplementary Figure 1A). Total  
98 transcriptome, open chromatin and DNA methylation were analysed at various stages of  
99 zebrafish PGC development (Figure 1A). We first assessed transcriptome features  
100 associated with developmental stages and cell type and identified major changes  
101 coinciding with key events of development. As shown in Figure 1B and C, hierarchical  
102 clustering and Principal Component Analyses (PCA) demonstrated minimal  
103 transcriptome variance at and immediately after zygotic genome activation (high and  
104 dome stages) with small observable difference between replicates of germ plasm-  
105 containing and somatic cells (Figure 1C, Supplementary Figure 1B and Supplementary  
106 Table 1). However, gradual divergence between the somatic and PGC transcriptomes was  
107 coincidental with migration of PGCs and perinuclear localisation of the germ plasm (at 10  
108 somites stage), leading to a marked separation of steady-state transcript content between  
109 PGCs and somatic cells by prim-5 stage.

110 In order to determine the transcriptional contribution to PGC development over time, we  
111 classified differentially expressed genes into four main groups of temporal expression  
112 patterns using k-means clustering (Figure 1D and Supplementary Figure 1C). Within each  
113 cluster, genes with distinct biological functions could be identified, as highlighted by  
114 group-specific enrichment for gene ontology terms (Supplementary Figure 1D). Genes  
115 belonging to Cluster 1 were upregulated in the somatic cells at 10 somites and prim-5  
116 (late) stages over every other sample. As expected, these were associated with  
117 developmental processes, differentiation and protein translation. Cluster 2 included  
118 those genes upregulated in late PGCs. Interestingly, we noted several pathways involved  
119 in chromatin reorganisation, in particular related to DNA packaging. At this  
120 developmental stage, germ cells are found in the future genital ridge and show a very low  
121 proliferative activity. Accordingly, genes downregulated in the PGCs at late stages versus

122 all other stages were mainly involved in cellular division (Cluster 4), while the Cluster 3  
123 grouped genes for germ fate and thus validate the successful sorting of PGCs.  
124 Taken together, these results demonstrate successful isolation and genome-wide  
125 comparative characterisation of PGCs at various developmental stages, which show  
126 stage- and cell type-specific transcriptomic differences. Overall, early germ cells have a  
127 similar transcriptional profile with the rest of the embryo, which gradually diverges as  
128 lineage specification proceeds. At the prim5 stage, analysis of PGC transcriptomes  
129 suggests reduced cell proliferation and epigenetic reorganisation compared to somatic  
130 cells (Cluster 2 and 4, Supplementary Figure 1D).

131

### 132 **Zebrafish primordial germ cells do not delay zygotic genome activation**

133 Global transcriptomic analysis suggested that PGCs and somatic cells are broadly similar  
134 during early zebrafish development. Therefore, although other germ plasm-dependent  
135 organisms delay transcriptional activation in the PGCs, the mild transcriptional  
136 difference between PGCs and somatic cells at ZGA suggested that transcriptional  
137 activation of the germ line may occur alongside the rest of the embryo. We therefore  
138 asked whether gene expression in PGCs is repressed during the time when ZGA  
139 commences in all the blastomeres. We utilised a recently developed in-vivo transcription  
140 imaging tool (MOVIE) and 4D imaged the accumulation and localisation of *microRNA-430*  
141 (*miR-430*) primary transcripts, which are the earliest known expressed genes highly  
142 active during ZGA in zebrafish (Giraldez et al., 2006; Hadzhiev et al., 2019). Upon injection  
143 of fluorescently-labelled morpholinos, we monitored *miR-430* expression in embryos in  
144 which germ plasm was tracked by GFP. Interestingly, *miR-430* expression was detectable  
145 in somatic cells as well as germ plasm-containing cells already before the main wave of  
146 genome activation (Figure 2A, Supplementary Figure 2A and 2B), suggesting that germ  
147 plasm does not substantially delay/inhibit early transcription. Also, *miR-430* expression  
148 faded around the onset of epiboly in both PGCs and somatic cells, suggesting similar  
149 temporal transcriptional regulation between the PGCs and somatic cells.

150 In order to better understand the relation between ZGA and germ plasm, we studied the  
151 composition of the PGC transcriptome by identifying differentially expressed genes  
152 across ZGA via RNA-seq (Methods). The number of significantly upregulated genes  
153 increased more than an order of magnitude when the germ plasm-carrying cells

154 transition from 256-cell to high stage (135 genes when  $\text{padj} < 0.1$  and 124 when  $\text{padj} <$   
155  $0.05$ ) or from high to dome stages (1926 genes when  $\text{padj} < 0.1$  and 1629 when  $\text{padj} <$   
156  $0.05$ ) (Figure 2B, 2E and Supplementary Table 2). Interestingly, of the 135 upregulated  
157 genes after ZGA, 60 were predicted to be zygotically transcribed without maternal  
158 contribution (Figure 2C). Zygotic genes were predicted as those with expression lower  
159 than 2 tpm at 256-cell stage (no zygotic transcription), which show an increase in  
160 expression levels at the subsequent analysed developmental stage. To validate our  
161 analysis, we compared our list of predicted zygotic genes with an independent RNA-seq  
162 dataset (White et al., 2017). The high degree of overlap between the predicted zygotic  
163 and maternal genes within the two datasets supported our arbitrary discrimination  
164 between maternally-deposited and zygotically-expressed transcripts (Supplementary  
165 Figure 2C). Notably, out of 60 zygotic genes found upregulated in the PGCs at high stage,  
166 56 matched predicted zygotic genes from analysis of the independent RNA-seq  
167 experiment (data not shown). This observation suggests that transcription activation  
168 does occur at the time when the rest of the blastomeres are also becoming  
169 transcriptionally active. Interestingly, among the significantly upregulated genes in the  
170 PGCs at high stage, germ cell markers and germ plasm-localised transcripts such as *ddx4*,  
171 *dnd1*, *tdrd7a*, *gra* and *dazl* were found upregulated from the previous stage  
172 (Supplementary Figure 2D). This was unexpected as germ plasm markers are of maternal  
173 origin and are known not to be transcribed until after gastrulation (Blaser et al., 2005;  
174 Knaut et al., 2000; Weidinger et al., 1999).

175 Then, the occurrence of ZGA in the germ plasm-carrying cells was further confirmed after  
176 performing a regression-based clustering of genes with similar expression profiles for  
177 three stages spanning the first wave of ZGA (256-cell, high and dome) in PGCs and  
178 somatic cells. Interestingly, we found two clusters of genes upregulated in both PGCs and  
179 somatic cells and one in which genes were upregulated in PGCs exclusively (Figure 2D).

180 Finally, to further verify the observation of occurrence of active transcription between  
181 256-cell and high stage in PGCs, we measured absolute RNA levels over time. After  
182 normalisation for an internal RNA control (Jiang et al., 2011) (Supplementary Figure 2F),  
183 we found a significant increase in transcript levels in both PGCs and somatic cells at high  
184 stage, confirming that active transcription is present in both cell types before the high  
185 stage (Figure 2F).

186 Based on our results, we concluded that the germ plasm does not cause general  
187 transcriptional repression in zebrafish, and zebrafish PGCs do not delay ZGA as it has  
188 been seen in *C. elegans*, *D. melanogaster* or *X. laevis*.

189

### 190 **Selective retention of zygotically-produced transcripts explains transcriptome** 191 **differences between germ plasm-carrying cells and somatic cells at ZGA**

192 The observations that germ plasm-carrying cells do not delay transcriptional activation  
193 in comparison to the rest of the embryo -yet they appear to carry de-novo generated germ  
194 cell-specific transcripts- prompted us to ask whether differential transcription occurs  
195 between germ plasm-carrying cells and somatic cells at ZGA. Therefore, we sought to  
196 study the nature of ZGA in the pre-migratory PGCs in comparison to the somatic cells. To  
197 verify whether the PGCs undergo selective transcriptional activation, we performed  
198 differential gene expression analysis of isolated germ plasm-carrying cells and somatic  
199 cells at each stage spanning ZGA period. This analysis revealed that before ZGA, already  
200 a total of 22 genes were differentially expressed between the two cell types ( $p_{adj} < 0.1$ )  
201 (Figure 3A), confirming that maternal mRNAs are selectively retained in the PGCs as  
202 shown previously (Eno et al., 2018; Gazdag et al., 2009; Gerovska and Araúzo-Bravo,  
203 2016; Gorokhova et al., 2007; Levine et al., 2000; Rothschild et al., 2013). However, it was  
204 noteworthy that 11 out of 22 identified transcripts have not yet been associated with  
205 germ cell or PGC functions and are candidates for novel maternal germ plasm-  
206 transcripts. The remaining 11 transcripts instead were either known germ plasm  
207 markers (*gra*, *tdrd7*, *rg514a*, *ca15b*, *dnd1* and *dazl*) or being previously associated with  
208 germ cell development/survival (*hook2*, *tgfa*, *zswim5*, *b4galt6*, *camk2g1*) (Supplementary  
209 Table 3).

210 During genome activation (high stage), we identified 142 genes significantly differently  
211 regulated between PGCs and somatic cells (Figure 3A). Interestingly, when the number  
212 of upregulated genes from one stage to the next was taken into account, we noted a  
213 similar trend of gene upregulation in both PGCs and somatic cells, indicating that both  
214 the cell types experienced equal transcriptional activation signals (Supplementary Figure  
215 3A). By confirming that ZGA in PGCs and somatic cells is similar, we observed that the  
216 relative abundance of transcripts upregulated from 256-cell to high stage in only one cell  
217 type was still comparable between germ cells and somatic cells at high stage  
218 (Supplementary Figure 3B). Also, the fold change of increased gene expression between



219 256-cell and high stage showed high correlation between germ plasm-carrying cells and  
220 somatic cells (Supplementary Figure 3C). Taken together, these observations suggested  
221 that both the cell types activate their genomes similarly.

222 To address whether retention of the germ plasm in PGCs impacts directly on PGC-specific  
223 transcriptional activation and to trace any transcriptional source of the small variation in  
224 steady state RNA levels during genome activation, we monitored transcriptional activity  
225 using chromatin accessibility state at cis-regulatory elements as a surrogate. We  
226 performed Assay for Transposase-Accessible Chromatin combined with sequencing  
227 (ATAC-seq) in PGCs and somatic cells. Open chromatin landscapes were analysed globally  
228 and compared between PGCs and somatic cells at high and dome stages (start of main  
229 ZGA wave). Interestingly, global comparison of open chromatin regions between PGCs  
230 and somatic cells at high stage indicated a high degree of correlation (Figure 3B). No  
231 distinguishable difference in chromatin accessibility for PGCs and somatic cells was  
232 observed on either promoters or distal elements of genes with differential expression  
233 between PGCs and somatic cells (Figure 3C). The germ line gene *ddx4*, whose expression  
234 was shown by the RNA-seq analysis to increase from 256-cell to high stage only in PGCs,  
235 appeared to possess similar degree of chromatin accessibility at its promoter and cis  
236 regulatory regions in both cell types (Figure 3D). Taken together, these observations  
237 prompted us to hypothesise that, while zygotic transcriptional activation is broadly  
238 similar between somatic and germ plasm-carrying cells, the detected differential gene  
239 expression was caused by post-transcriptional regulation.

240 While it was previously reported that maternal RNAs are selectively protected in the  
241 PGCs from miRNA-dependent degradation (Mishima et al., 2006), this mechanism has not  
242 yet been shown to occur on zygotically-active germ cell genes. As the top-scoring  
243 upregulated genes in the PGCs from 256-cell to high stage are known-germ plasm  
244 markers, we hypothesised that these are not only deposited by the mother in the germ  
245 plasm but are also produced zygotically throughout the early embryo including the  
246 somatic cells where they are selectively cleared. To test this hypothesis and to  
247 discriminate between maternally-provided and zygotic germ plasm transcripts, we took  
248 advantage of our RNA-seq data to perform differential Intron Retention (IR) analysis  
249 (Middleton et al., 2017). As intron splicing is co-transcriptional (Merkhofer et al., 2014),  
250 newly-transcribed RNAs are expected to show increased intron retention. We compared  
251 IR scores for the whole transcriptome before and after ZGA, and observed increase of

252 intron retention in both PGCs and somatic cells upon transcriptional activation  
253 (Supplementary Figure 3D). Then we focused on assessing IR in de-novo transcription of  
254 germ cell-specific transcripts in somatic cells. A significant increase in intron retention  
255 from the previous stage was observed when compared to random sampling of the dataset  
256 (Figure 3E). This result further supports the hypothesis that genes transcribed in the  
257 PGCs at ZGA were also activated in the somatic cells.

258 To further validate this observation, we performed quantitative PCR (qPCR) on nuclear  
259 and cytoplasmic cell fractions before and after ZGA after removal of PGCs via FACS  
260 (Supplementary Table 4). Interestingly, when transcription has started, we saw a  
261 significant increase in fold change expression for these genes in the nuclear fraction but  
262 not in the cytoplasmic fraction, suggesting that germ cell-related transcripts could be  
263 produced by the somatic cells (Supplementary Figure 3E). In order to demonstrate that  
264 somatic cells transcribe germ cell-specific RNAs, we studied the localisation of newly-  
265 transcribed pre-mRNA within the embryo. Within those transcripts that were selectively  
266 upregulated in the PGCs from 256-cell to high stage, *dazl* was one of the highest-scoring  
267 hits (Supplementary Figure 3F). We therefore designed RNA probes targeting intronic  
268 sequences to visualise unprocessed, newly-produced *dazl* pre-mRNA and carried out  
269 fluorescence in-situ hybridization at different stages with and without transcription  
270 block. Strikingly, *dazl* was seen to be actively transcribed in the somatic cells, as  
271 demonstrated by staining of nuclear foci in the whole embryo at high stage (Figure 3F).  
272 Taken together, these results suggest that transcription of germ cell genes occurs  
273 throughout the embryo at ZGA. Upon integration with ATAC- and RNA-seq results, we  
274 propose that there is no transcriptional delay or differential transcription in germ plasm-  
275 carrying cells when zygotic genome is activated. Selective protection of zygotic  
276 transcripts together with maternal transcript by the germ plasm may thus contribute to  
277 early germ cell specification and onset of migration.

278

## 279 **Primordial germ cells gain specific transcriptomic and epigenetic features during** 280 **migration**

281 We next asked how transcriptome and chromatin states reflect the distinct ontogeny of  
282 PGCs and somatic cells during migration and further development. About 4 hours after  
283 fertilisation (dome stage), PGCs initiate independent and guided movements, which will  
284 bring them into the future genital ridge site (Raz, 2003). The germ plasm undergoes

285 extensive morphological changes during germ cell migration (Figure 1A). Also, this  
286 period coincides with gastrulation and germ layer formation, with remarkable  
287 transformation of the whole embryo transcriptome upon lineage diversification (Raj et  
288 al., 2018). Our differential gene expression analysis between PGCs and somatic cells  
289 indicates increasing divergence of transcriptomes coinciding with germ fate acquisition  
290 in the migrating PGCs (as shown in Figure 1D). The number of differentially expressed  
291 genes between PGCs and somatic cells gradually increased over time, reaching almost  
292 one-third of the total transcriptome at prim-5 stage (Figure 4A). To trace the cell type as  
293 the source of transcriptome variation, we looked at the number of upregulated genes  
294 from one stage to the in PGCs and somatic cells selectively. We noted that the increase in  
295 differential gene expression between PGCs and somatic cells was accompanied by an  
296 increase in differential gene expression over time (Figure 4B, Supplementary Figure 4A  
297 and Supplementary Table 5), suggesting that both PGCs and somatic cells were  
298 undergoing cellular commitment. In-depth analysis of the migratory PGC transcriptome  
299 showed overexpression of several chromatin remodelers. The DNA methyltransferase 3  
300 (*dnmt3bb.1*), responsible for de-novo methylation of CpG islands, was upregulated in  
301 PGCs when compared to somatic cells, while the Ten Eleven Translocase 2 (*tet2*) was  
302 downregulated. Concomitantly, upregulation of the arginine methyltransferase *prmt6*,  
303 lysine demethylases (*kdm7* and *kdm8*) and bromodomain-containing proteins (*brdt* and  
304 *brd9*) in the PGCs suggested for potential mechanisms of chromatin remodelling via  
305 histone modifications (data not shown).

306 The differential expression of chromatin regulation prompted us to ask whether germ  
307 fate acquisition involves observable epigenetic and chromatin changes as was described  
308 in murine PGCs. Therefore, we compared global chromatin accessibility in PGCs and  
309 somatic cells via ATAC-seq. After selection of reproducible peaks via irreproducible  
310 discovery rate (IDR) filtering (Zhang et al., 2017) (IDR < 0.05) (Supplementary Figure 4B  
311 and Supplementary Table 6), we compared global variability of chromatin accessibility  
312 among developmental stages and cell types (Figure 4C and Supplementary Figure 4C). In  
313 accordance with transcriptome results, early PGCs and somatic cells have similar open  
314 chromatin profiles and cluster by stage rather than by cell type. In contrast, marked  
315 separation of PGC and somatic cell chromatin accessibility profiles was observed after  
316 gastrulation and resulted in the identification of lineage specific sites of open chromatin  
317 (Supplementary Figure 4D).

318 Following differential chromatin accessibility analysis, we found 12591 peaks  
319 upregulated in the PGCs ( $\log_{2}FC < -1$ ,  $p_{adj} < 0.05$ ) and 23771 peaks upregulated in the  
320 somatic cells ( $\log_{2}FC > 1$ ,  $p_{adj} < 0.05$ ) at prim-5 stage (Figure 4D). We then used self-  
321 organising map (SOM) analysis on PGC and somatic ATAC-seq data at different stages to  
322 identify patterns of cis-regulatory element accessibility via an unsupervised approach  
323 (Figure 4E). We identified 9 clusters of open chromatin dynamics. Of these, SOM  
324 identified 9869 sites that were specific for late stage PGCs and 12654 sites that were less  
325 accessible in the PGCs compared to the late stage somatic cells. Interestingly, genes in  
326 proximity of somatic-specific ATAC peaks were associated with Gene Ontology (GO)  
327 terms for embryonic morphogenesis, tissue formation and embryonic development.  
328 These results highlighted that germ fate acquisition requires chromatin regulation.  
329 To gain more insight into the epigenetic specification of PGCs under the control of the  
330 germ plasm, we profiled the DNA methylome of pre- and migratory PGCs by performing  
331 Reduced Representation Bisulfite Sequencing (RRBS) (Murphy et al., 2018). In contrast  
332 to mammals (Guo et al., 2015; Hill et al., 2018), we found no extensive DNA methylation  
333 reprogramming of PGCs during these stages (Figure 4G and Supplementary Figure 4F).  
334 Analysis of differentially methylated CpGs between PGCs and somatic cells identified  
335 3825 significantly differentially methylated regions (Supplementary Table 7) (only  
336 1.77% of all recovered CpGs from all samples), revealing an overall highly similar  
337 methylation programme, in accord with recent studies (Ortega-Recalde et al., 2019;  
338 Skvortsova et al., 2019). Based on this result, we concluded that DNA methylation  
339 dynamics and chromatin remodelling in zebrafish PGCs were uncoupled.  
340 The finding that post-migratory PGCs show a specific chromatin accessibility landscape  
341 in contrast to the early germ plasm-carrying cells suggests that the onset of germ fate  
342 acquisition occurs during PGC migration and coincides with the subcellular re-  
343 localisation of the germ granules. In addition, differences between PGCs and somatic cells  
344 were more marked when chromatin accessibility was profiled in comparison with DNA  
345 methylation. This prompted us to investigate more closely the contribution of chromatin  
346 regulation to gene expression on different genetic elements.

347

348 **Primordial germ cell-specific open chromatin profile is enriched for promoter-**  
349 **proximal putative enhancers and depleted for promoter-distal, developmental**  
350 **putative enhancers**

351 After having established that migrating PGCs undergo chromatin rearrangements, we  
352 asked how their epigenetic features contribute to transcription and germ fate acquisition.  
353 First, we discriminated between core promoters and distal cis-regulatory elements based  
354 on ATAC-seq results in migrating PGCs and somatic cells (prim-5 stage). Gene promoters  
355 were defined as sequences within 500bp from annotated Transcription Start Sites (TSSs),  
356 while the excluded ATAC peaks (accessible chromatin) within 50kb from the closest TSS  
357 were defined as distal elements. Comparison between normalised ATAC signals in PGCs  
358 and somatic cells showed that the chromatin profiles were more dissimilar on non-  
359 promoter associated open chromatin regions (Figure 5A). In order to further dissect the  
360 chromatin accessibility state across the genome, we performed differential chromatin  
361 accessibility analysis ( $\log_{2}FC > 1$ ,  $p_{adj} < 0.05$ , fold enrichment  $> 4$ ) and we focussed on the  
362 distribution of differentially regulated ATAC peaks over genic elements. While most of  
363 the somatic ATAC peaks occurred at promoter-distal regions, PGC-specific ATAC peaks  
364 tended to coincide with promoter (Supplementary Figure 5A). In the PGCs, 43% of the  
365 upregulated open regions were found within 1kb from the TSS, while 11% was associated  
366 with introns. On the other hand, 41% of the upregulated regions in the somatic cells were  
367 found within introns, and only 6% was associated with promoters. We aimed to define  
368 putative somatic enhancer regions by intersecting the upregulated ATAC peaks with  
369 active enhancer histone mark H3K27ac (Bogdanovic et al., 2012). Out of all identified  
370 somatic-specific ATAC peaks ( $\log_{2}FC > 1$  and  $p_{adj} < 0.05$ ), almost 30% were associated  
371 with H3K27ac histone marks. In contrast, less than 10% of PGC-specific ATAC peaks  
372 ( $\log_{2}FC < -1$ ) matched location of somatic H3K27ac peaks (Supplementary Figure 5B). The  
373 functional relevance of cell type-specific chromatin accessibility was estimated by GO  
374 analysis of genes associated with differential open chromatin regions away from  
375 promoters. As expected, somatic cells were enriched for open chromatin regions in  
376 proximity of genes for developmental and differentiation pathways, while PGC-specific  
377 ATAC peaks were found in proximity of genes for germ fate, cellular transport and stem  
378 cell differentiation (Figure 5B and Supplementary Figure 5C). As GO terms for both gene  
379 expression and chromatin accessibility pointed at similar pathways involved in PGC  
380 specification, we sought to verify whether accessible DNA regions would be predictive of

381 transcriptional activity. To verify this, we compared the fold change of gene expression  
382 between PGCs and somatic cells for a subset of transcripts characterised by significant  
383 differential open chromatin between the two cell types. Interestingly, we noted a  
384 significant correlation between cell type-specific, promoter-associated ATAC peaks and  
385 transcriptional output in both PGCs and somatic cells (Figure 5C, left). On the other hand,  
386 the accessibility of distal elements was not predictable of transcription in the PGCs, while  
387 a higher correlation between transcription and chromatin accessibility was observed in  
388 the somatic cells (Figure 5C, right). This result suggests that transcriptional regulation in  
389 migratory PGCs is less dependent on distal elements. In support, we observed an inverse  
390 trend of correlation between open chromatin and gene expression in relation to distance  
391 from the TSS for PGCs and somatic cells (Supplementary Figure 5D). Moreover, the  
392 cumulative distribution of PGC/somatic-specific cis-regulatory elements in relation to  
393 the closest transcription start sites showed that PGC-specific cis-regulatory elements  
394 were found more proximal to TSSs in comparison to somatic-specific ones (Figure 5D).  
395 Taken together, these results indicate that regions of open chromatin predicted to drive  
396 gene expression from a distance are less frequent in PGCs.

397 Next we asked what epigenetic mechanisms may be involved in keeping putative distal  
398 enhancers closed in PGCs. Two mechanisms have been implicated in enhancer activation:  
399 DNA demethylation and histone priming (Bogdanović et al., 2016; Zhang et al., 2018).  
400 Although little variation was seen in global DNA methylation profiles of PGCs and somatic  
401 cells at prim-5 stage (Figure 4E), we explored methylation dynamics in the PGCs further  
402 by discriminating promoter and enhancer regions. When comparing methylation levels  
403 across stages and cell types, we observed that promoters preserve their methylation  
404 status. Out of 13 validated genes between PGCs and somatic cells, only *ddx4* showed  
405 differential DNA methylation on its promoter (Supplementary Figure 5E). In contrast,  
406 more dynamic methylation pattern was seen on putative enhancers. In particular,  
407 demethylation observed in late somatic cells was not observed in the PGCs, which instead  
408 resembled the early profiles characterised by higher levels of DNA methylation (Figure  
409 5E and Supplementary Table 7). Interestingly, putative enhancers showed concomitant  
410 higher methylation and significant lower chromatin accessibility in the PGCs compared  
411 to the somatic cells (Figure 5F). Next, we tested whether the observed methylation  
412 changes were coupled with changes in modulators of DNA methylation. We found  
413 upregulation in the PGCs of four out of six *dnmt3bb.1* and *dnmt3bb.2* genes, while no

414 significant change was detected for *dnmt1* gene. On the other hand, *tet2* expression was  
415 higher in the somatic cells compared to the PGCs, suggesting that PGCs may lack  
416 mechanisms of hydroxymethylation-mediated DNA demethylation catalysis (Breiling  
417 and Lyko, 2015; Hill et al., 2018) (Figure 5F).

418 Based on these results, we propose that PGCs avoid somatic cellular commitment and  
419 somatic fate by inhibiting transcription of developmental genes upon block of chromatin  
420 opening of their enhancers. Moreover, PGCs appear to transcribe genes which, unlike  
421 developmental genes, are enriched in promoter-proximal regulatory elements and thus  
422 appear to be regulated by contrasting chromatin topology from that seen in somatic cells.

423

#### 424 **TDRD7a, a germ plasm-segregating protein, is required for maintaining germ line-** 425 **specific chromatin and transcriptome signature**

426 Our genome-wide analysis of chromatin accessibility demonstrated a germ line-specific  
427 chromatin reprogramming, which coincides with the transition of the subcellular  
428 localisation of the germ granules from cytoplasmic to perinuclear during the early phases  
429 of migration (5-6hpf) (Doitsidou et al., 2002; Strasser et al., 2008; Updike et al., 2011;  
430 Weidinger et al., 2003). After this stage, the germ plasm associates with the nuclear  
431 membrane, although the role of this interaction remains unknown. We hypothesised that  
432 the observed transcriptome divergence between PGCs and somatic cells could be driven  
433 by perinuclear germ plasm-mediated gene regulation mechanisms detectable on the level  
434 of chromatin changes. A known germ plasm marker is the protein Tudor domain 7  
435 (Tdrd7), which is also one of the highest differentially expressed genes in the reported  
436 RNA-seq dataset at all developmental stages (data not shown). When translation of Tdrd7  
437 is inhibited by morpholino interference, the germ plasm is incapable of fragmenting and  
438 forming small localised granules (Strasser et al., 2008). In order to test whether Tdrd7  
439 and perinuclear germ granules are required for genome-wide chromatin rearrangement  
440 observed in PGCs, we investigated the chromatin accessibility and transcriptome profiles  
441 of embryos, in which germ plasm localisation was perturbed upon morpholino-mediated  
442 Tdrd7 knock-down (KD) (Supplementary Figure 6A and Supplementary Table 8).

443 Differential gene expression analysis of Tdrd7 KD and wild type PGCs at prim-5 stage  
444 indicated a dramatic effect by the loss of Tdrd7 (Figure 6A and Supplementary Table 9).  
445 Gene ontology analysis indicated that downregulated genes were enriched for genes  
446 involved in reproduction and germ cell development, while upregulated genes were

447 enriched in genes associated with developmental process, organogenesis and protein  
448 expression processes (Supplementary Figure 6B). These observations suggested that, in  
449 absence of Tdrd7 and correct germ plasm distribution, germ cell character was lost in  
450 favour of somatic lineage fate acquisition. Indeed, PCA analysis of variance among Tdrd7  
451 wild type and KD embryo transcriptomes demonstrated that lack of Tdrd7 in PGCs shifted  
452 their transcriptome profile towards somatic-like transcriptome (Figure 6B). Detailed  
453 RNA-seq analysis highlighted that genes downregulated in PGCs upon Tdrd7 KD also  
454 include genes associated with pluripotency and zygotic genes for gametogenesis. While  
455 ubiquitously expressed housekeeping genes were unaffected (Figure 6C and Figure 6E).  
456 It was noteworthy, that maternally-inherited germ plasm transcripts showed only  
457 slightly reduced levels in the Tdrd7-lacking PGCs as compared to control PGCs  
458 (Supplementary Figure 6C and Supplementary Figure 6D). This could be caused  
459 inhibition of late PGC-specific transcription upon Tdrd7 KD, while maternal mRNAs were  
460 preserved. These observations indicate that disruption of Tdrd7 function with germ  
461 plasm mis-localisation leads to global deregulation of PGC transcription programme and  
462 mild notable effect on germ plasm RNAs.

463 Next, we asked whether the causes of differential gene expression in Tdrd7 KD PGCs  
464 could be traceable to the chromatin state. To this end, ATAC-seq was carried out on Tdrd7  
465 KD PGCs at prim-5 stage and compared to control PGCs. Global analysis of open  
466 chromatin in Tdrd7 KD embryos revealed a marked effect by Tdrd7 loss in the PGCs. Open  
467 chromatin of Tdrd7 KD PGCs resembled more to that in the wild type somatic cells than  
468 to wild type and PGCs injected with a morpholino control, suggesting that the observed  
469 transcriptome phenotype was accompanied by chromatin changes (Figure 6D).

470 Analysis of putative cis-regulatory element in proximity of misregulated genes in Tdrd7  
471 morphant embryos showed a general tendency towards compaction of PGC-specific  
472 genes regions, while development- and morphogenesis-associated genes gained open  
473 chromatin peaks in comparison to control PGC cells (Figure 6E and Supplementary Figure  
474 6D). To get a more comprehensive overview of mechanisms governing chromatin  
475 regulation in the PGCs and to confirm the association between chromatin accessibility  
476 profile and apparent reprogramming of PGCs towards the somatic fates, we have carried  
477 out a global analysis of open chromatin behaviour upon Tdrd7 knock down and  
478 generated SOM classes of putative regulatory elements (Supplementary Figure 6E).  
479 Unsupervised sample clustering confirmed epigenetic differences between wild type and



480 Tdrd7 KD PGCs, indicating distinct shift of PGC chromatin states towards somatic fate,  
481 when translation of *tdrd7* was inhibited and the germ granules were mis-localised. Of  
482 note, PGC-specific genes, such as *dazl*, which are expressed zygotically as well as inherited  
483 maternally in the germ plasm, were shown to be associated with closure of promoter and  
484 candidate enhancers despite only mild reduction in their RNA levels (Supplementary  
485 Figure 6D).  
486 These results demonstrate transcription regulatory roles for the germ plasm  
487 determinant Tdrd7 and suggest that perinuclear germ plasm-nucleus cross-talk is  
488 required for germ cell-specific gene activation and fate decision.  
489

## 490 **DISCUSSION**

491 In this study, we have investigated the transcriptome, chromatin accessibility and DNA  
492 methylation dynamics during early development of PGCs in a germ plasm-dependent  
493 vertebrate. The use of the Tg(Buc-GFP) line, combined with ATAC- and RNA-seq, has  
494 allowed us to investigate the nuclear and cytoplasmic roles of the germ plasm at  
495 unprecedented resolution. Moreover, by following chromatin and transcriptional  
496 features in the germ line over time, we were able to describe two distinct roles for germ  
497 cell-specific cytoplasmic granules. We link these two roles with two distinct germ plasm  
498 subcellular distributions and distinguished an early and a late phase of germ fate  
499 acquisition in zebrafish (Figure 7). In contrast to many animal models, we demonstrated  
500 that germ plasm contributes to post-transcriptional regulation of both maternal and  
501 zygotic gene products, with no detectable effect on transcription during and after genome  
502 activation. Following commencement of PGC migration and re-localisation of the germ  
503 plasm, PGC-specific chromatin accessibility profiles evolve together with PGC-specific  
504 transcription, which we show are Tdrd7-dependent and likely mediated by re-  
505 localisation of the germ granules.

506

### 507 **ZGA is not delayed in zebrafish germ plasm-carrying cells**

508 Germ plasm factors block or delay zygotic genome activation by sequestering RNA  
509 polymerase II (RNA Poll II) or its co-factors at the time of transcriptional activation in  
510 many organisms (Batchelder et al., 1999; Mello et al., 1996). By delaying the ZGA, the  
511 PGCs avoid the commencement of developmental differentiation programmes  
512 characteristic to the developing somatic lineages. In mouse, in which PGCs develop by  
513 induction and without maternal germ plasm (Lawson et al., 1999; Ohinata et al., 2009;  
514 Saitou and Yamaji, 2012), newly-formed germ cells undergo transcriptional quiescence  
515 for a short period of time (Kurimoto et al., 2008). The mechanisms of transcription  
516 pausing are not fully understood, however they involve inhibition of the elongation factor  
517 P-TEFb by Pgc and PIE-1 proteins in *D. melanogaster* and *C. elegans* (Hanyu-Nakamura et  
518 al., 2008; Mello et al., 1996) and sequestration of the general transcription factor TAF4 in  
519 *C. elegans* (Güven-Ozkan et al., 2008). In sharp contrast, immunostaining of Serine 2-  
520 phosphorylated RNA Poll II, showed localised nuclear foci in zebrafish germ plasm-  
521 carrying cells as early as 256-cell stage (Knaut et al., 2000), suggesting that delay of  
522 genome activation in the germ line may not occur in this species and that alternative

523 mechanisms of germ fate acquisition may exist. In this study, we imaged transcription in-  
524 vivo for the first time in PGCs and together with transcriptome analysis, provide  
525 independent lines of evidence that the germ plasm does not delay the first wave of Zygotic  
526 Genome Activation (ZGA) in zebrafish. These findings indicate striking plasticity in  
527 establishing the germ cell fate among clades and raise the prospect that transcriptional  
528 delay is not essential for PGC formation. Interestingly, since massive transcriptional  
529 activation has been previously shown to cause double strand break (DSB) in the  
530 embryonic germ line (Butuči et al., 2015), by not delaying ZGA zebrafish PGCs may  
531 experience a milder transition from a non-transcribing to a transcribing state while being  
532 less exposed to DNA damage.

533

### 534 **Why do PGCs need zygotic contribution to maternally deposited PGC mRNAs?**

535 We provide several lines of evidence to show that PGCs and somatic cells transcribe  
536 similar set of genes during blastula stages and that there is no overt difference in their  
537 chromatin states. We analysed chromatin accessibility, de-novo transcript abundance,  
538 intron retention and intron-containing nascent RNA localisation, which all indicate no  
539 difference in transcription between the PGCs and the somatic cells. Strikingly, we report  
540 that PGC-specific RNAs are also zygotically transcribed in the somatic precursors, where  
541 their maternal counterparts are known to be promptly degraded by zygotic machineries  
542 (Giraldez et al., 2006; Mishima et al., 2006). Thus, it is unclear why somatic cells produce  
543 PGC-specific RNAs. This unexpected observation may be explained by chromatin  
544 accessibility organisation of undifferentiated pluripotent stem cells, such as the  
545 blastomeres of the zebrafish embryo at and immediately after ZGA. Pluripotent cells  
546 display less compact chromatin organisation than differentiating cells (Andrey and  
547 Mundlos, 2017) and are characterised by accessible chromatin with low, but detectable  
548 activity of a broad range of genes. In contrast, differentiating cells are characterised by  
549 gradual divergence of accessibility of lineage and cell type specific-enhancers (Ladstätter  
550 and Tachibana, 2019; Lu et al., 2016; Perino and Veenstra, 2016). Therefore, it is feasible  
551 that during ZGA, zebrafish blastomeres carry a pluripotent ES-like chromatin and  
552 corresponding transcription state characterised by broad capacity of gene expression.  
553 This primordial state of chromatin organisation, likely lacks or only commences the  
554 formation of chromatin architecture characteristic of differentiating cells during  
555 development (Kaaij et al., 2018). It is conceivable that, in this primordial chromatin

556 architecture, sophisticated, enhancer-dependent regulation has not yet been established  
557 and gene expression occurs without lineage-specificity and as such it tolerates, for  
558 example, germ-cell specific gene expression in the somatic progenitors. In this model,  
559 emphasis is on post-transcriptional control of gene expression and germ plasm-  
560 mediated, selective stabilisation of zygotic transcripts could be the primary source of  
561 divergence of transcriptome between PGCs and somatic cells (Figure 7). In support of  
562 this, several germ plasm factors are known to contribute to post-transcriptional and  
563 translational regulation. For example, the RNA binding germ plasm component Dnd1  
564 stabilises maternal mRNAs selectively by restricting access of miRNAs responsible for  
565 clearing maternal mRNAs in the somatic cells (Giraldez et al., 2006; Kedde et al., 2007).  
566 Likewise, the germ factor Nanos has been implicated in destabilisation of RNAs and  
567 translational inhibition in the germ cells in combination with Pumilio and CCR4-NOT (Lee  
568 et al., 2017; Suzuki et al., 2012).

569 An additional question emerging from our finding is why zebrafish PGCs need zygotic  
570 contribution to PGC-specific mRNA activity at ZGA, while most of these PGC-specific RNAs  
571 are already present either in the germ plasm or in the cytoplasm of germ plasm-  
572 containing PGCs. While we cannot answer this question directly, it is likely that such early  
573 activation of zygotic transcription is either redundant, similarly to the thousands of  
574 mRNAs which are both present maternally and zygotically in the somatic progenitors  
575 (Haberle et al., 2014; Harvey et al., 2013) or that the zygotic component is required to  
576 gradually take over and compensate for loss and or dilution of maternal mRNA in dividing  
577 PGCs.

578

### 579 **A germ plasm-mediated epigenetic reprogramming engages germ fate**

580 Germ plasm-carrying cells initiate independent and active migratory movements by  
581 dome stage (Blaser et al., 2005; Bontems et al., 2009; Eno and Pelegri, 2016; Eno et al.,  
582 2018; Raz, 2003; Yoon et al., 1997), suggesting that migration may, in part, be  
583 transcriptionally regulated. However, given the minimal transcriptional differences  
584 observed between PGCs and somatic cells, the main mode of regulation is expected to be  
585 post-transcriptional. As shown before, early migratory movements are triggered by Dnd-  
586 mediated loss of cell adhesion (Blaser et al., 2005) as well as the interaction between the  
587 C-X-C chemokine receptor type 4b (Cxcr4b) on the PGC surface and the ligand Cxcl12a  
588 (Doitsidou et al., 2002). Additionally, translational inhibition of *nanos* and *oskar* mediated

589 by the germ plasm factors Bruno and CUP is required during germ cell formation in *D.*  
590 *melanogaster* (Nakamura et al., 2004; Wilhelm et al., 2003), while the RNA-binding  
591 protein DAZL inhibits translation of several mRNAs involved in pluripotency, somatic  
592 differentiation and apoptosis in mouse PGCs (Chen et al., 2014). It is thus not surprising  
593 that the germ plasm-specific factor *dazl* is degraded after ZGA in the somatic precursors  
594 to restrict its function onto the PGCs in zebrafish. While we have not explored the mRNA  
595 clearance process involved in removing zygotically-transcribed mRNAs from the somatic  
596 cells, this is likely achieved via the global regulator of maternal mRNA degradation, *miR-*  
597 *430* (Giraldez et al., 2006). Based on our results, we speculate that the germ plasm is  
598 exclusively required to protect and process both maternal and zygotic transcripts during  
599 onset of migration in the germ plasm-carrying cells. This feature provides the germ  
600 plasm-carrying cells with unique capacities, likely required for triggering migration and  
601 providing foundation for downstream molecular cues, which will initiate the second  
602 phase of PGC development.

603 We have demonstrated, that unique chromatin accessibility programming occurs in the  
604 zebrafish PGCs and that this cis-regulatory element-associated topology contributes to  
605 avoiding somatic differentiation. Also, we were able to associate germ plasm re-  
606 localisation as an extranuclear effector, which acts on chromatin remodelling coinciding  
607 with perinuclear localisation (Figure 7). In line with this observation, interference with  
608 germ plasm localisation via its regulator Tdrd7 impacts on the PGC fate, which correctly  
609 migrate, but experience somatic differentiation during and following migration.

610 Notably, our results with DNA methylation analysis demonstrate that even in the absence  
611 of global DNA demethylation (Macleod et al., 1999; Bogdanović et al., 2016; Skvortsova  
612 et al., 2019), local, differential methylation between PGCs and somatic cells is observed  
613 at regulatory sites. However, in contrast to mammalian PGCs, where DNA methylation is  
614 almost completely erased genome-wide (Guo et al., 2015; Hill et al., 2018), we observe an  
615 inverse trend in zebrafish, where hypermethylation is found on somatic putative  
616 enhancers, suggesting remarkably different mechanism for epigenetic programming of  
617 the germ line among vertebrates. This was further corroborated with open chromatin  
618 analysis genome-wide, which showed lack of opening somatic enhancers in PGCs.  
619 Interestingly, although our study led to the identification of PGC-specific putative  
620 regulatory elements, we found low correlation between opening of distal ATAC peaks and  
621 transcription. Higher correlation between chromatin accessibility and transcription was

622 detected for TSS-proximal cis-acting elements in PGCs than in somatic cells. This finding,  
623 in line with previous reports in humans (Guo et al., 2017), suggests that transcription  
624 activation in PGCs is achieved by short-range interactions. Nevertheless, additional  
625 studies focusing on the DNA interactions, Topological Associated Domains (TADs)  
626 formation and spatial organisation of the chromatin in the developing germ line will  
627 contribute to better understand the chromatin architecture-associated mechanisms of  
628 acquisition and maintenance of totipotency.

629

### 630 **Importance of germ plasm components and subcellular organisation**

631 In accordance with previous studies, our results confirm that removal of individual germ  
632 plasm components is sufficient to trigger somatic differentiation in the PGCs (Gross-  
633 Thebing et al., 2017; Lee et al., 2017). Tdrd7-depleted PGCs preserve germ granules, germ  
634 factors and correctly reach the genital ridge (Hosokawa et al., 2007; Strasser et al., 2008),  
635 suggesting that pathways upstream migratory movements are unaffected. However,  
636 despite this mild phenotype, we report a remarkable somatic-like chromatin accessibility  
637 and consequent transcriptional reprogramming. Based on this result, we speculate that  
638 lack of Tdrd7 and incorrect germ granule localisation are sufficient to diverge the fate of  
639 the embryonic germ line and induce activation of somatic differentiation pathways.

640 Tdrd7 is known to interact with Piwi, a piRNAs processor (Huang et al., 2011). Piwi-  
641 mediated piRNAs processing has been associated with epigenetic changes in both the  
642 somatic and the germ line (Houwing et al., 2007), therefore it is tempting to speculate  
643 about a link between piRNA pathways and germ fate maintenance. For example, piRNAs  
644 are known to control transposon silencing via H3K9me3 and, in general, to regulate  
645 chromatin state on piRNA-target regions (Huang et al., 2013; Sienski et al., 2012).  
646 Interestingly, it has been recently reported that germ granules protect germ line  
647 transcripts from piRNA-mediated silencing, regulating the pace of release from the  
648 cytoplasm to the nucleus (Ouyang et al., 2019). To date, we cannot conclude on whether  
649 the germ granules re-localisation is epistatic to the epigenetic germ fate acquisition or  
650 vice-versa. However, the multiple lines of evidence associating Piwi and piRNAs to  
651 epigenetic regulation strongly suggest a possible requirement of the germ plasm-nuclear  
652 interaction in order to trigger initiation of epigenetic germ fate. In conclusion, we suggest  
653 that perinuclear localisation of the germ plasm and Tdrd7 are involved in chromatin  
654 reprogramming of gonadal PGCs during somitogenesis. Our discoveries have

655 fundamental implications in the understanding of pluripotent fate acquisition and the  
656 functional relationship between subcellular aggregates with epigenetic and chromatin  
657 reprogramming.  
658

659 **ACKNOWLEDGEMENT**

660 This work was supported by the H2020 programme Zencode-ITN, Wellcome Trust  
661 Investigator award (106955/Z/15/Z) and BBSRC (BB/L010488/1) to F.M. and B.L. and  
662 HFSP programme grant to F.M. and B.C. and NEURAM FET H2020 project of the European  
663 Commission to FM. We thank Brian Dalley for sequencing expertise, K.T. Varley for  
664 helping us adapt Patch Bisulfite PCR, the HCI high-throughput genomics core, flow  
665 cytometry core, HCI fish facility, and the Centralized Zebrafish Animal Resource (CZAR)  
666 facility at the University of Utah. Financial support was received from the Howard Hughes  
667 Medical Institute and the Huntsman Cancer Institute core facilities (CA042014). We  
668 thank Erez Raz and Katsiaryna Tarbashevich at the Center for Molecular Biology of  
669 Inflammation (ZMBE) in Muenster for advice on the isolation of PGCs and comments on  
670 the manuscript. We thank Roland Dosch at the University Medical Center in Göttingen for  
671 providing the Tg(Buc-GFP) line and the BMSU facility at the University of Birmingham for  
672 zebrafish maintenance. We thank the Tech Hub core at the University of Birmingham for  
673 the flow cytometry and NGS equipment and technical support provided.

674

675

676 **AUTHORS CONTRIBUTIONS**

677 F.M.D. and F.M. conceived the study and wrote the manuscript. All the authors critically  
678 revised the manuscript. All experiments were performed by F.M.D. except for the  
679 following: Y.G. generated RRBS libraries from isolated genomic DNA. A.J. produced light  
680 sheet images of morpholino-injected Buc-GFP embryos. ATAC-seq data were analysed by  
681 F.M.D. and P.B. RNA-seq analysis was performed by F.M.D. and B.H.R. RRB-seq analysis  
682 was designed by B.C. and Y.G and performed by Y.G. and B.C.

683



## 684 **METHODS**

### 685 **Animal procedures**

686 All animal work was performed under the Project Licence # b6b8b391, in accordance  
687 with the UK Home Office regulations and UK Animals (Scientific Procedures) Act 1986.

688 Fish pairs were crossed in 1 litre breeding tanks and kept overnight separated. The next  
689 morning, the gate was removed and the eggs collected at intervals of 5 minutes to ensure  
690 synchrony. Fertilised eggs were dechorionated by 10mg/mL Pronase and serial washes  
691 in sterile E3 medium. After dechorionation, embryos were kept in agarose-coated petri  
692 dishes at 28.5 °C in a 14/10 hours of light/dark respectively. Wild type (AB), Tg(Buc-GFP)  
693 and Tg(kop:eGFP) lines were used during this work.

694

### 695 **Microinjections of zebrafish embryos**

696 Morpholinos were diluted in phenol red and about 0.3 pM were injected into the yolk of  
697 fertilised zebrafish embryos with a glass needle as described in Hadzhiev et al., 2019.

698

### 699 **Transcription block**

700 Transcription block was achieved through embryo incubation in 1 µM triptolide (Sigma  
701 T3652) in E3 medium from the single-cell stage to completion of the experiment.

702

### 703 **PGC preparation for FACS**

704 PGCs were isolated at different stages via FACS. Tg(Buc-GFP) heterozygous embryos  
705 were grown at the desired stage by incubation in E3 medium supplemented with 1mg/ml  
706 gentamicin at 28.5°C. Embryos were washed three times in sterile water before collection  
707 and about 200 of them were pulled in single microcentrifuge tubes. 500 µl of HBSS  
708 supplemented with 0.25% BSA and 10mM Hepes were added and dissociation occurred  
709 by pipetting for 2 minutes with a glass pipette. Excess of yolk was removed by two rounds  
710 of 3 minutes centrifugation at 350 x g at 4°C, while pelleted cells were resuspended in  
711 1ml HBSS supplemented with 0.25% BSA and 10mM Hepes prior of filtering. Cell  
712 suspension was kept on ice for the entire isolation procedure.

713

### 714 **Fluorescent in-situ hybridization**

715 Dechorionated embryos were collected at the desired stage, washed in cold PBS and fixed  
716 in 4% PFA at 4°C for 1 hour. Fixed embryos were then dehydrated in increasing dilutions

717 of methanol (25, 50, 75, 100 %) and left from overnight to one month at -20°C. The  
718 embryos were rehydrated in decreasing dilutions of methanol (75, 50, 25%) and washed  
719 5 times in PBST (0.1%) for 5 minutes with gentle agitation. In order to acclimatise the  
720 sample to the high temperature and the hybridization conditions, the embryos were  
721 incubated for 2 hours at 70°C in 200 µl of Hybridization Buffer (HB) (50% deionized  
722 formamide, 5X SSC, 0.1% Tween-20, 50 µg/ml of heparin bile salts, 500 µg/ml of  
723 extracted RNase-free tRNA, pH 6.0). From 50 to 100 ng of DIG-labelled RNA probes  
724 targeting *dazl* transcripts (Forward: ACTAAAGTTGTAGCTGGGCCT, Reverse:  
725 CCTGAGTGGGCGTTAATGTT) were added to the HB and incubated overnight at 70°C. The  
726 next day, the probes were removed by four washes in increasing dilutions of 2 X SSC (NaCl  
727 0.3M; Sodium citrate 0.03M) at 70°C (25, 50, 75, 100 %). The sample was then washed  
728 twice in 0.2% of SSC at 70°C 30 minutes each. The 0.2 X SSC was replaced by four serial  
729 dilutions in PBST 0.1% in order to remove any left-over probe. Washes were performed  
730 at room temperature with gentle agitation. The embryos were blocked in Blocking Buffer  
731 + Maleic Acid (Roche, 11585762001) for at least 3 hours before the anti-DIG antibody  
732 was added in a concentration of 1:5000 and incubated overnight at 4°C. The next day the  
733 antibody was washed five times in PBST 0.1% with gentle agitation at room temperature  
734 (30 minutes each) and fluorescently-tagged by horseradish peroxidase-catalysed signal  
735 amplification (Thermo Scientific, T20913)

736

### 737 **Imaging**

738 Embryos were placed in an agarose-coated petri dish and eventually embedded in  
739 agarose and imaged with a Zeiss 780 confocal or Z1 light sheet microscopes. Images were  
740 taken with the Zeiss ZEN pro 2.0 acquisition software with standard settings. Fixed  
741 samples were mounted in glycerol-based VectaShield (Vector laboratories, H-1000, UK)  
742 on a slide and covered with a glass slip. When preservation of the body shape was  
743 required, imaging dishes with glass bottom were used to avoid disintegration of the  
744 embryos.

745

### 746 **Nuclear-cytoplasmic fractionation and qPCR**

747 Embryos were set on ice and dissociated as described earlier. Nuclear and cytoplasmic  
748 fractions were separated by two washes in nuclei isolation buffer (Tris-HCl pH 7.4 10mM,  
749 NaCl 10mM, MgCl<sub>2</sub> 3mM and 0.1% IGEPAL CA-630) followed by 5 minutes centrifugation

750 at 500 x g. RNA was extracted from the two fractions with the RNAeasy Mini Extraction  
751 kit (Qiagen, 74044, UK), converted in cDNA via the SuperScript™ III Reverse  
752 Transcriptase (Thermo Fisher, 18080093, UK) and used for qPCR.

753

#### 754 **Reduced Representation Bisulfite Sequencing (RRBS-Seq)**

755 Genomic DNA were extracted from 4500-7500 sorted somatic cells or PGCs at high, dome  
756 and prim-5 stage in duplicates and digested with MspI at 37°C for 3 hours. The fragment  
757 ends were repaired with Klenow exo at 37°C for 50 minutes. Then Methylated Illumina  
758 Pair-end Adaptors were ligated to gDNA fragments using T4 DNA ligase. The bisulfite  
759 conversion were performed using Zymo Research EZ DNA Methylation Gold kit. Libraries  
760 were PCR amplified for twenty cycles using Platinum Taq DNA polymerase and  
761 sequenced on Illumina HiSeq 2500 on 50bp single-end mode.

762

#### 763 **Patch Bisulfite PCR**

764 Genomic DNA were extracted from 5000 sorted somatic cells or PGCs at prim-5, with  
765 three replicates for each cell types. Whole Genome Amplified genomic DNA (WGA gDNA)  
766 were generated from prim-5 WT Tu fish embryos using GE GenomiPhi V2 DNA  
767 Amplification Kits. 30 ng of DNA from sorted cells, 100 ng of genomic DNA from prim-5  
768 embryos (non-bisulfite conversion control) and 100 ng of WGA gDNA (hypomethylation  
769 control) were digested with HpyCH4V and NlaIII at 37°C for 1 hour following by heat  
770 inactivation for 20 minutes at 65°C. Then custom universal primers were ligated to the  
771 targeted fragments using HiFi Taq DNA ligase with the help of gene specific designed  
772 oligo patches. The reaction was incubated at 95°C for 15 minutes followed by 30 seconds  
773 at 94°C and 4 minutes at 65°C for 25 cycles, and was held at 4°C. Unligated DNA fragments  
774 were removed by Exo I and Exo III treatment at 37°C for 1 hour followed by heat  
775 inactivation at 80°C for 20 minutes. Bisulfite Conversion were performed following Zymo  
776 EZ DNA Methylation Gold kit manufacturer's instruction. This step was skipped for non-  
777 bisulfite control sample. The eluted DNA were PCR amplified using EpiMark Hot Start Taq  
778 DNA polymerase. Libraries were sequenced on Miseq 250bp paired-end mode.

779

## 780 **ATAC-seq library preparation and sequencing**

781 Two biological repeats for PGCs and somatic cells at high (wild type), prim-5 (wild type)  
782 and morpholino-injected prim-5 (5mm and MO) were prepared. Cells were sorted into  
783 500 µl of cold PBS Mg-, Ca- and immediately treated for ATAC. Nuclear isolation and  
784 transposition reaction occurred as described in Buenrostro et al., 2013. Tagmented DNA  
785 libraries were purified with 1.2X volume of AMPure XP beads. DNA bound to the beads  
786 was washed twice in 80% ethanol and eluted in 20 µl of water. Indexed fragments were  
787 checked in concentration by qPCR, profiled by Bioanalyzer, equimolarly pooled and  
788 sequenced on an Illumina Next-Seq 550.

789

## 790 **RNA-seq library preparation and sequencing**

791 cDNA was prepared from two biological repeats according to manufacturer's instructions  
792 as follows. Two hundred cells were sorted in 8.5µl of water (0.2U/µl RNase inhibitor).  
793 Immediately after collection, cells were added with 1µl of lysis buffer (0.2U/µl RNase  
794 inhibitor) and 1 ul of ERCC Mix1-2 (final dilution  $1 \times 10^{-6}$ ) and flash-frozen. Reverse  
795 transcription was performed following the SMART-Seq v4 protocol. Indexed fragments  
796 were checked in concentration by qPCR, profiled by Bioanalyzer, equimolarly pooled and  
797 sequenced on an Illumina Next-Seq 550.

798

## 799 **ATAC-seq analysis**

800 Paired-end ATAC reads were mapped to the genome using Bowtie2, not allowing  
801 discordant mapping of reads (--no-discordant) and insert sizes larger than 5000bp (--  
802 maxins 5000). Results were filtered for mapping quality (10) and for mapping to  
803 chromosomes 1 to 25 with the exclusion of the mitochondrial chromosome and of contigs  
804 present in danRer7/10 assemblies. There was no removal of subsequent read pairs  
805 mapping to the same locus (so called duplicate removal).

806 Mapped and filtered ATAC reads were corrected for Tn5 transposase overhang by adding  
807 5bp to the position of the start of the first read and by subtracting 4bp from the end of  
808 the second read in the read pair as described in Buenrostro et al., 2013. Both thus  
809 obtained Tn5 cut sites were extended by a fixed amount. For genome browser  
810 visualisation 25bp was added to Tn5 cut sites yielding two 51bp-long regions for each  
811 read pair. For PCA and SOM analysis a shorter 5bp extension was used. No selection for  
812 particular insert size fraction was used.

### 813 **Enhancer calling in somatic cells and PGCs**

814 The set of putative enhancers was obtained from ATAC-seq in the following way. MACS2  
815 was used with options -f BED -g 1.412e9 --keep-dup all --nolambda --nomodel to call  
816 peaks in each sample and replicate separately. Four replicate pairs in PGCs and somatic  
817 cells at high and at prim5 stages were used to identify peaks reproducible across  
818 replicates with Irreproducible Discovery Rate (IDR)<sup>2</sup> approach. At 5% IDR the number  
819 of reproducible peaks were for soma/high: 12,862; PGC/high: 14,029; soma/prim5:  
820 79,494; PGC/prim5: 61,641. After a further removal of peaks within 500bp from any  
821 known transcript start (ENSEMBL version 79/91) and of width greater than 1000bp  
822 remaining peak numbers dropped to soma/high: 4,935; PGC/high: 5,097; soma/prim5:  
823 55,784; PGC/prim5: 36,071.

824 As the last step four peaks sets were merged in a union and thus unified peaks were once  
825 again filtered for length  $\leq 1000$ bp. This yielded a total of 70,612 candidate enhancers.

### 826 **Principal Component Analysis and Self Organising Map clustering**

827 In order to assign open chromatin scores to enhancers, windows of size 601bp around  
828 enhancer centre were used. ATAC signal levels from genome browser track were  
829 extracted (sum of signal values in 601bp bins proportional to the number of 5' ends of  
830 reads falling into these bins and normalised to the total number of reads in each sample)  
831 with the help of genomation package<sup>3</sup> and saved into a matrix. For PCA and SOM, levels  
832 were log-transformed and “centred” by subtracting the mean of each matrix column  
833 (sample). For SOM, an additional row (enhancer) centering was performed effectively  
834 making SOM operate on log-fold change values.

835

### 836 **Bioinformatic analysis for RRBS**

837 Fastq files were aligned to ZV10 genome and processed using bismark(--bowtie1).  
838 Methylation level data were collected using bismark\_methylation\_extractor with  
839 parameters of --bedGraph --cutoff 6 --merge\_non\_CpG --comprehensive. Following  
840 methylation data were analysed using methylKit package in R with three replicates for  
841 each cell types at different developmental stages.

## 842 **Bioinformatic analysis for Patch bisulfite PCR**

843 Adapters were removed using cutadapt with parameters of -a  
844 AGTGTGGGAGGGTAGTTGGTGTT -A ACTCCCCACCTTCCTCATTCTCTAAGACGGTGT --  
845 minimum-length 10 for Read 1 and Read 2. Adapter trimmed fastq files were then aligned  
846 to ZV10 genome and processed using bismark (--bowtie2). Methylation level data were  
847 collected using bismark\_methylation\_extractor with parameters of --bedGraph --cutoff 6  
848 --merge\_non\_CpG --comprehensive. The output CpG coverage files were converted to  
849 colorBED files using a custom script. The colorBED files were loaded and visualized on  
850 UCSC genome browser.

851

## 852 **RNA-seq analysis**

853 Fastq files were checked for quality by fastqc and trimmed by trimmomatic. Sequencing  
854 reads were aligned to the zebrafish genome (danRer9/10) by STAR (v.2.6.1) with the  
855 following settings: --seedSearchStartLmax 12 --outFilterScoreMinOverLread 0.3 --  
856 alignSJoverhangMin 15 --outFilterMismatchNmax 33 --outFilterMatchNminOverLread 0 --  
857 outFilterType BySJout --outSAMunmapped Within --outSAMattributes NH HI AS NM MD --  
858 outSAMstrandField intronMotif --outWigType bedGraph --quantMode GeneCounts.

859 Raw read counts were loaded into R and differential expression analysis over samples  
860 and stages was performed using DESeq2 (v.1.6.3) and maSigPro packages.

861

## 862 **Statistics**

863 All experiments for which statistical analyses were performed were repeated three times.  
864 All sequencing experiments were performed in biological duplicates with the exception  
865 of ATAC-seq for dome and 10-somites stages. Data from independent biological repeats  
866 were pooled together and the statistical distribution of the dataset was evaluated upon  
867 Shapiro-Wilk test. For normally distributed datasets, the p-value was estimated upon t-  
868 test, while for non-normally distributed datasets, Wilcoxon test was used.

869

870 **REFERENCES**

- 871 Andrey, G., and Mundlos, S. (2017). The three-dimensional genome: regulating gene  
872 expression during pluripotency and development. *Dev. Camb. Engl.* *144*, 3646–3658.
- 873 Batchelder, C., Dunn, M.A., Choy, B., Suh, Y., Cassie, C., Shim, E.Y., Shin, T.H., Mello, C.,  
874 Seydoux, G., and Blackwell, T.K. (1999). Transcriptional repression by the *Caenorhabditis*  
875 *elegans* germ-line protein PIE-1. *Genes Dev.* *13*, 202–212.
- 876 Beer, R.L., and Draper, B.W. (2013). *nanos3* maintains germline stem cells and expression  
877 of the conserved germline stem cell gene *nanos2* in the zebrafish ovary. *Dev. Biol.* *374*,  
878 308–318.
- 879 Bender, L.B., Cao, R., Zhang, Y., and Strome, S. (2004). The MES-2/MES-3/MES-6 complex  
880 and regulation of histone H3 methylation in *C. elegans*. *Curr. Biol. CB* *14*, 1639–1643.
- 881 Blaser, H., Eisenbeiss, S., Neumann, M., Reichman-Fried, M., Thisse, B., Thisse, C., and Raz,  
882 E. (2005). Transition from non-motile behaviour to directed migration during early PGC  
883 development in zebrafish. *J. Cell Sci.* *118*, 4027–4038.
- 884 Bogdanovic, O., Fernandez-Miñán, A., Tena, J.J., de la Calle-Mustienes, E., Hidalgo, C., van  
885 Kruysbergen, I., van Heeringen, S.J., Veenstra, G.J.C., and Gómez-Skarmeta, J.L. (2012).  
886 Dynamics of enhancer chromatin signatures mark the transition from pluripotency to cell  
887 specification during embryogenesis. *Genome Res.* *22*, 2043–2053.
- 888 Bogdanović, O., Smits, A.H., de la Calle Mustienes, E., Tena, J.J., Ford, E., Williams, R.,  
889 Senanayake, U., Schultz, M.D., Hontelez, S., van Kruijsbergen, I., et al. (2016). Active DNA  
890 demethylation at enhancers during the vertebrate phylotypic period. *Nat. Genet.* *48*, 417–  
891 426.
- 892 Breiling, A., and Lyko, F. (2015). Epigenetic regulatory functions of DNA modifications: 5-  
893 methylcytosine and beyond. *Epigenetics Chromatin* *8*, 24.
- 894 Buenrostro, J.D., Giresi, P.G., Zaba, L.C., Chang, H.Y., and Greenleaf, W.J. (2013).  
895 Transposition of native chromatin for fast and sensitive epigenomic profiling of open  
896 chromatin, DNA-binding proteins and nucleosome position. *Nat. Methods* *10*, 1213–1218.
- 897 Butuč, M., Williams, A.B., Wong, M.M., Kramer, B., and Michael, W.M. (2015). Zygotic  
898 Genome Activation Triggers Chromosome Damage and Checkpoint Signaling in *C. elegans*  
899 Primordial Germ Cells. *Dev. Cell* *34*, 85–95.
- 900 Charlesworth, A., Wilczynska, A., Thamp, P., Cox, L.L., and MacNicol, A.M. (2006). Musashi  
901 regulates the temporal order of mRNA translation during *Xenopus* oocyte maturation.  
902 *EMBO J.* *25*, 2792–2801.

- 903 Chen, H.-H., Welling, M., Bloch, D.B., Muñoz, J., Mientjes, E., Chen, X., Tramp, C., Wu, J.,  
904 Yabuuchi, A., Chou, Y.-F., et al. (2014). DAZL limits pluripotency, differentiation, and  
905 apoptosis in developing primordial germ cells. *Stem Cell Rep.* 3, 892–904.
- 906 Doitsidou, M., Reichman-Fried, M., Stebler, J., Köprunner, M., Dörries, J., Meyer, D.,  
907 Esguerra, C.V., Leung, T., and Raz, E. (2002). Guidance of primordial germ cell migration  
908 by the chemokine SDF-1. *Cell* 111, 647–659.
- 909 Draper, B.W., McCallum, C.M., and Moens, C.B. (2007). nanos1 is required to maintain  
910 oocyte production in adult zebrafish. *Dev. Biol.* 305, 589–598.
- 911 Eddy, E.M. (1975). Germ plasm and the differentiation of the germ cell line. *Int. Rev. Cytol.*  
912 43, 229–280.
- 913 Eno, C., and Pelegri, F. (2016). Germ Cell Determinant Transmission, Segregation, and  
914 Function in the Zebrafish Embryo. In *Insights from Animal Reproduction*, R. Payan  
915 Carreira, ed. (InTech), p.
- 916 Eno, C., Gomez, T., Slusarski, D.C., and Pelegri, F. (2018). Slow calcium waves mediate  
917 furrow microtubule reorganization and germ plasm compaction in the early zebrafish  
918 embryo. *Dev. Camb. Engl.* 145.
- 919 Forbes, A., and Lehmann, R. (1998). Nanos and Pumilio have critical roles in the  
920 development and function of *Drosophila* germline stem cells. *Dev. Camb. Engl.* 125, 679–  
921 690.
- 922 Gaydos, L.J., Rechtsteiner, A., Egelhofer, T.A., Carroll, C.R., and Strome, S. (2012).  
923 Antagonism between MES-4 and Polycomb repressive complex 2 promotes appropriate  
924 gene expression in *C. elegans* germ cells. *Cell Rep.* 2, 1169–1177.
- 925 Gazdag, E., Santenard, A., Ziegler-Birling, C., Altobelli, G., Poch, O., Tora, L., and Torres-  
926 Padilla, M.-E. (2009). TBP2 is essential for germ cell development by regulating  
927 transcription and chromatin condensation in the oocyte. *Genes Dev.* 23, 2210–2223.
- 928 Gerovska, D., and Araúzo-Bravo, M.J. (2016). Does mouse embryo primordial germ cell  
929 activation start before implantation as suggested by single-cell transcriptomics  
930 dynamics? *Mol. Hum. Reprod.* 22, 208–225.
- 931 Giraldez, A.J., Mishima, Y., Rihel, J., Grocock, R.J., Van Dongen, S., Inoue, K., Enright, A.J., and  
932 Schier, A.F. (2006). Zebrafish MiR-430 promotes deadenylation and clearance of  
933 maternal mRNAs. *Science* 312, 75–79.



- 934 Gkountela, S., Zhang, K.X., Shafiq, T.A., Liao, W.-W., Hargan-Calvopiña, J., Chen, P.-Y., and  
935 Clark, A.T. (2015). DNA Demethylation Dynamics in the Human Prenatal Germline. *Cell*  
936 *161*, 1425–1436.
- 937 Gorokhova, S., Bibert, S., Geering, K., and Heintz, N. (2007). A novel family of  
938 transmembrane proteins interacting with beta subunits of the Na,K-ATPase. *Hum. Mol.*  
939 *Genet.* *16*, 2394–2410.
- 940 Gross-Thebing, T., Yigit, S., Pfeiffer, J., Reichman-Fried, M., Bandemer, J., Ruckert, C.,  
941 Rathmer, C., Goudarzi, M., Stehling, M., Tarbashevich, K., et al. (2017). The Vertebrate  
942 Protein Dead End Maintains Primordial Germ Cell Fate by Inhibiting Somatic  
943 Differentiation. *Dev. Cell* *43*, 704–715.e5.
- 944 Guo, F., Yan, L., Guo, H., Li, L., Hu, B., Zhao, Y., Yong, J., Hu, Y., Wang, X., Wei, Y., et al. (2015).  
945 The Transcriptome and DNA Methylome Landscapes of Human Primordial Germ Cells.  
946 *Cell* *161*, 1437–1452.
- 947 Guo, H., Hu, B., Yan, L., Yong, J., Wu, Y., Gao, Y., Guo, F., Hou, Y., Fan, X., Dong, J., et al. (2017).  
948 DNA methylation and chromatin accessibility profiling of mouse and human fetal germ  
949 cells. *Cell Res.* *27*, 165–183.
- 950 Guven-Ozkan, T., Nishi, Y., Robertson, S.M., and Lin, R. (2008). Global transcriptional  
951 repression in *C. elegans* germline precursors by regulated sequestration of TAF-4. *Cell*  
952 *135*, 149–160.
- 953 Haberle, V., Li, N., Hadzhiev, Y., Plessy, C., Previti, C., Nepal, C., Gehrig, J., Dong, X., Akalin,  
954 A., Suzuki, A.M., et al. (2014). Two independent transcription initiation codes overlap on  
955 vertebrate core promoters. *Nature* *507*, 381–385.
- 956 Hadzhiev, Y., Qureshi, H.K., Wheatley, L., Cooper, L., Jasiulewicz, A., Van Nguyen, H., Wragg,  
957 J.W., Poovathumkadavil, D., Conic, S., Bajan, S., et al. (2019). A cell cycle-coordinated  
958 Polymerase II transcription compartment encompasses gene expression before global  
959 genome activation. *Nat. Commun.* *10*, 691.
- 960 Hanyu-Nakamura, K., Sonobe-Nojima, H., Tanigawa, A., Lasko, P., and Nakamura, A.  
961 (2008). *Drosophila* Pgc protein inhibits P-TEFb recruitment to chromatin in primordial  
962 germ cells. *Nature* *451*, 730–733.
- 963 Harvey, S.A., Sealy, I., Kettleborough, R., Fenyves, F., White, R., Stemple, D., and Smith, J.C.  
964 (2013). Identification of the zebrafish maternal and paternal transcriptomes. *Dev. Camb.*  
965 *Engl.* *140*, 2703–2710.

966 Hill, P.W.S., Leitch, H.G., Requena, C.E., Sun, Z., Amouroux, R., Roman-Trufero, M.,  
967 Borkowska, M., Terragni, J., Vaisvila, R., Linnett, S., et al. (2018). Epigenetic  
968 reprogramming enables the transition from primordial germ cell to gonocyte. *Nature* *555*,  
969 392–396.

970 Hosokawa, M., Shoji, M., Kitamura, K., Tanaka, T., Noce, T., Chuma, S., and Nakatsuji, N.  
971 (2007). Tudor-related proteins TDRD1/MTR-1, TDRD6 and TDRD7/TRAP: domain  
972 composition, intracellular localization, and function in male germ cells in mice. *Dev. Biol.*  
973 *301*, 38–52.

974 Houwing, S., Kamminga, L.M., Berezikov, E., Cronembold, D., Girard, A., van den Elst, H.,  
975 Filippov, D.V., Blaser, H., Raz, E., Moens, C.B., et al. (2007). A role for Piwi and piRNAs in  
976 germ cell maintenance and transposon silencing in Zebrafish. *Cell* *129*, 69–82.

977 Huang, H.-Y., Houwing, S., Kaaij, L.J.T., Meppelink, A., Redl, S., Gauci, S., Vos, H., Draper,  
978 B.W., Moens, C.B., Burgering, B.M., et al. (2011). Tdrd1 acts as a molecular scaffold for Piwi  
979 proteins and piRNA targets in zebrafish. *EMBO J.* *30*, 3298–3308.

980 Iguchi, N., Tobias, J.W., and Hecht, N.B. (2006). Expression profiling reveals meiotic male  
981 germ cell mRNAs that are translationally up- and down-regulated. *Proc. Natl. Acad. Sci. U.*  
982 *S. A.* *103*, 7712–7717.

983 Irie, N., Weinberger, L., Tang, W.W.C., Kobayashi, T., Viukov, S., Manor, Y.S., Dietmann, S.,  
984 Hanna, J.H., and Surani, M.A. (2015). SOX17 is a critical specifier of human primordial  
985 germ cell fate. *Cell* *160*, 253–268.

986 Jiang, L., Schlesinger, F., Davis, C.A., Zhang, Y., Li, R., Salit, M., Gingeras, T.R., and Oliver, B.  
987 (2011). Synthetic spike-in standards for RNA-seq experiments. *Genome Res.* *21*, 1543–  
988 1551.

989 Kaaij, L.J.T., van der Weide, R.H., Ketting, R.F., and de Wit, E. (2018). Systemic Loss and  
990 Gain of Chromatin Architecture throughout Zebrafish Development. *Cell Rep.* *24*, 1-10.e4.

991 Kedde, M., Strasser, M.J., Boldajipour, B., Oude Vrielink, J.A.F., Slanchev, K., le Sage, C.,  
992 Nagel, R., Voorhoeve, P.M., van Duijse, J., Ørom, U.A., et al. (2007). RNA-binding protein  
993 Dnd1 inhibits microRNA access to target mRNA. *Cell* *131*, 1273–1286.

994 Knaut, H., Pelegri, F., Bohmann, K., Schwarz, H., and Nüsslein-Volhard, C. (2000). Zebrafish  
995 vasa RNA but not its protein is a component of the germ plasm and segregates  
996 asymmetrically before germline specification. *J. Cell Biol.* *149*, 875–888.

997 Köprunner, M., Thisse, C., Thisse, B., and Raz, E. (2001). A zebrafish nanos-related gene is  
998 essential for the development of primordial germ cells. *Genes Dev.* *15*, 2877–2885.

999 Kurimoto, K., Yabuta, Y., Ohinata, Y., Shigeta, M., Yamanaka, K., and Saitou, M. (2008).  
1000 Complex genome-wide transcription dynamics orchestrated by Blimp1 for the  
1001 specification of the germ cell lineage in mice. *Genes Dev.* *22*, 1617–1635.

1002 Ladstätter, S., and Tachibana, K. (2019). Genomic insights into chromatin reprogramming  
1003 to totipotency in embryos. *J. Cell Biol.* *218*, 70–82.

1004 Lawson, K.A., Dunn, N.R., Roelen, B.A., Zeinstra, L.M., Davis, A.M., Wright, C.V., Korving, J.P.,  
1005 and Hogan, B.L. (1999a). Bmp4 is required for the generation of primordial germ cells in  
1006 the mouse embryo. *Genes Dev.* *13*, 424–436.

1007 Lawson, K.A., Dunn, N.R., Roelen, B.A., Zeinstra, L.M., Davis, A.M., Wright, C.V., Korving, J.P.,  
1008 and Hogan, B.L. (1999b). Bmp4 is required for the generation of primordial germ cells in  
1009 the mouse embryo. *Genes Dev.* *13*, 424–436.

1010 Lee, C.-Y.S., Lu, T., and Seydoux, G. (2017). Nanos promotes epigenetic reprogramming of  
1011 the germline by down-regulation of the THAP transcription factor LIN-15B. *ELife* *6*.

1012 Lesch, B.J., and Page, D.C. (2014). Poised chromatin in the mammalian germ line.  
1013 *Development* *141*, 3619–3626.

1014 Levine, E., Cupp, A.S., Miyashiro, L., and Skinner, M.K. (2000). Role of transforming growth  
1015 factor- $\alpha$  and the epidermal growth factor receptor in embryonic rat testis  
1016 development. *Biol. Reprod.* *62*, 477–490.

1017 Lu, F., Liu, Y., Inoue, A., Suzuki, T., Zhao, K., and Zhang, Y. (2016). Establishing Chromatin  
1018 Regulatory Landscape during Mouse Preimplantation Development. *Cell* *165*, 1375–  
1019 1388.

1020 Macleod, D., Clark, V.H., and Bird, A. (1999). Absence of genome-wide changes in DNA  
1021 methylation during development of the zebrafish. *Nat. Genet.* *23*, 139–140.

1022 Mello, C.C., Schubert, C., Draper, B., Zhang, W., Lobel, R., and Priess, J.R. (1996). The PIE-1  
1023 protein and germline specification in *C. elegans* embryos. *Nature* *382*, 710–712.

1024 Merkhofer, E.C., Hu, P., and Johnson, T.L. (2014). Introduction to cotranscriptional RNA  
1025 splicing. *Methods Mol. Biol. Clifton NJ* *1126*, 83–96.

1026 Middleton, R., Gao, D., Thomas, A., Singh, B., Au, A., Wong, J.J.-L., Bomane, A., Cosson, B.,  
1027 Eyra, E., Rasko, J.E.J., et al. (2017). IRFinder: assessing the impact of intron retention on  
1028 mammalian gene expression. *Genome Biol.* *18*, 51.

1029 Mishima, Y., Giraldez, A.J., Takeda, Y., Fujiwara, T., Sakamoto, H., Schier, A.F., and Inoue, K.  
1030 (2006). Differential regulation of germline mRNAs in soma and germ cells by zebrafish  
1031 miR-430. *Curr. Biol. CB* *16*, 2135–2142.

- 1032 Murphy, P.J., Wu, S.F., James, C.R., Wike, C.L., and Cairns, B.R. (2018). Placeholder  
1033 Nucleosomes Underlie Germline-to-Embryo DNA Methylation Reprogramming. *Cell* *172*,  
1034 993-1006.e13.
- 1035 Nakamura, A., Sato, K., and Hanyu-Nakamura, K. (2004a). *Drosophila cup* is an eIF4E  
1036 binding protein that associates with Bruno and regulates oskar mRNA translation in  
1037 oogenesis. *Dev. Cell* *6*, 69–78.
- 1038 Nakamura, A., Sato, K., and Hanyu-Nakamura, K. (2004b). *Drosophila cup* is an eIF4E  
1039 binding protein that associates with Bruno and regulates oskar mRNA translation in  
1040 oogenesis. *Dev. Cell* *6*, 69–78.
- 1041 Ohinata, Y., Ohta, H., Shigeta, M., Yamanaka, K., Wakayama, T., and Saitou, M. (2009). A  
1042 Signaling Principle for the Specification of the Germ Cell Lineage in Mice. *Cell* *137*, 571–  
1043 584.
- 1044 Ortega-Recalde, O., Day, R.C., Gemmell, N.J., and Hore, T.A. (2019). Zebrafish preserve  
1045 global germline DNA methylation while sex-linked rDNA is amplified and demethylated  
1046 during feminisation. *Nat. Commun.* *10*, 3053.
- 1047 Oulhen, N., Swartz, S.Z., Laird, J., Mascaro, A., and Wessel, G.M. (2017). Transient  
1048 translational quiescence in primordial germ cells. *Dev. Camb. Engl.* *144*, 1201–1210.
- 1049 Ouyang, J.P.T., Folkmann, A., Bernard, L., Lee, C.-Y., Seroussi, U., Charlesworth, A.G.,  
1050 Claycomb, J.M., and Seydoux, G. (2019). P Granules Protect RNA Interference Genes from  
1051 Silencing by piRNAs. *Dev. Cell* *50*, 716-728.e6.
- 1052 Perino, M., and Veenstra, G.J.C. (2016). Chromatin Control of Developmental Dynamics  
1053 and Plasticity. *Dev. Cell* *38*, 610–620.
- 1054 Raj, B., Gagnon, J.A., and Schier, A.F. (2018). Large-scale reconstruction of cell lineages  
1055 using single-cell readout of transcriptomes and CRISPR-Cas9 barcodes by scGESTALT.  
1056 *Nat. Protoc.* *13*, 2685–2713.
- 1057 Raz, E. (2003). Primordial germ-cell development: the zebrafish perspective. *Nat. Rev.*  
1058 *Genet.* *4*, 690–700.
- 1059 Rechtsteiner, A., Ercan, S., Takasaki, T., Phippen, T.M., Egelhofer, T.A., Wang, W., Kimura,  
1060 H., Lieb, J.D., and Strome, S. (2010). The Histone H3K36 Methyltransferase MES-4 Acts  
1061 Epigenetically to Transmit the Memory of Germline Gene Expression to Progeny. *PLoS*  
1062 *Genet.* *6*, e1001091.
- 1063

- 1064 Riemer, S., Bontems, F., Krishnakumar, P., Gömann, J., and Dosch, R. (2015). A functional  
1065 Bucky ball-GFP transgene visualizes germ plasm in living zebrafish. *Gene Expr. Patterns*  
1066 *GEP 18*, 44–52.
- 1067 Roovers, E.F., Kaaij, L.J.T., Redl, S., Bronkhorst, A.W., Wiebrands, K., de Jesus Domingues,  
1068 A.M., Huang, H.-Y., Han, C.-T., Riemer, S., Dosch, R., et al. (2018). Tdrd6a Regulates the  
1069 Aggregation of Buc into Functional Subcellular Compartments that Drive Germ Cell  
1070 Specification. *Dev. Cell 46*, 285-301.e9.
- 1071 Rothschild, S.C., Lahvic, J., Francescato, L., McLeod, J.J.A., Burgess, S.M., and Tombes, R.M.  
1072 (2013). CaMK-II activation is essential for zebrafish inner ear development and acts  
1073 through Delta-Notch signaling. *Dev. Biol. 381*, 179–188.
- 1074 Saitou, M., and Yamaji, M. (2012). Primordial germ cells in mice. *Cold Spring Harb.*  
1075 *Perspect. Biol. 4*.
- 1076 Saitou, M., Barton, S.C., and Surani, M.A. (2002). A molecular programme for the  
1077 specification of germ cell fate in mice. *Nature 418*, 293–300.
- 1078 Seydoux, G., and Braun, R.E. (2006). Pathway to totipotency: lessons from germ cells. *Cell*  
1079 *127*, 891–904.
- 1080 Siddall, N.A., McLaughlin, E.A., Marriner, N.L., and Hime, G.R. (2006). The RNA-binding  
1081 protein Musashi is required intrinsically to maintain stem cell identity. *Proc. Natl. Acad.*  
1082 *Sci. U. S. A. 103*, 8402–8407.
- 1083 Skvortsova, K., Tarbashevich, K., Stehling, M., Lister, R., Irimia, M., Raz, E., and Bogdanovic,  
1084 O. (2019). Retention of paternal DNA methylome in the developing zebrafish germline.  
1085 *Nat. Commun. 10*, 3054.
- 1086 Strasser, M.J., Mackenzie, N.C., Dumstrei, K., Nakkrasae, L.-I., Stebler, J., and Raz, E. (2008).  
1087 Control over the morphology and segregation of Zebrafish germ cell granules during  
1088 embryonic development. *BMC Dev. Biol. 8*, 58.
- 1089 Strome, S., Kelly, W.G., Ercan, S., and Lieb, J.D. (2014). Regulation of the X chromosomes  
1090 in *Caenorhabditis elegans*. *Cold Spring Harb. Perspect. Biol. 6*.
- 1091
- 1092 Strome, S., and Updike, D. (2015). Specifying and protecting germ cell fate. *Nat. Rev. Mol.*  
1093 *Cell Biol. 16*, 406–416.

- 1094 Suzuki, A., Saba, R., Miyoshi, K., Morita, Y., and Saga, Y. (2012). Interaction between  
1095 NANOS2 and the CCR4-NOT deadenylation complex is essential for male germ cell  
1096 development in mouse. *PloS One* 7, e33558.
- 1097 Suzuki, H., Saba, R., Sada, A., and Saga, Y. (2010). The Nanos3-3'UTR is required for germ  
1098 cell specific NANOS3 expression in mouse embryos. *PloS One* 5, e9300.
- 1099 Tada, H., Mochii, M., Orii, H., and Watanabe, K. (2012). Ectopic formation of primordial  
1100 germ cells by transplantation of the germ plasm: direct evidence for germ cell  
1101 determinant in *Xenopus*. *Dev. Biol.* 371, 86–93.
- 1102 Tang, W.W.C., Dietmann, S., Irie, N., Leitch, H.G., Floros, V.I., Bradshaw, C.R., Hackett, J.A.,  
1103 Chinnery, P.F., and Surani, M.A. (2015). A Unique Gene Regulatory Network Resets the  
1104 Human Germline Epigenome for Development. *Cell* 161, 1453–1467.
- 1105 Updike, D.L., Hachey, S.J., Kreher, J., and Strome, S. (2011). P granules extend the nuclear  
1106 pore complex environment in the *C. elegans* germ line. *J. Cell Biol.* 192, 939–948.
- 1107 Varley, K.E., and Mitra, R.D. (2010). Bisulfite Patch PCR enables multiplexed sequencing  
1108 of promoter methylation across cancer samples. *Genome Res.* 20, 1279–1287.
- 1109 Vasileva, A., Tiedau, D., Firooznia, A., Müller-Reichert, T., and Jessberger, R. (2009). Tdrd6  
1110 is required for spermiogenesis, chromatoid body architecture, and regulation of miRNA  
1111 expression. *Curr. Biol. CB* 19, 630–639.
- 1112 Weidinger, G., Wolke, U., Köprunner, M., Klinger, M., and Raz, E. (1999). Identification of  
1113 tissues and patterning events required for distinct steps in early migration of zebrafish  
1114 primordial germ cells. *Dev. Camb. Engl.* 126, 5295–5307.
- 1115 Weidinger, G., Stebler, J., Slanchev, K., Dumstrei, K., Wise, C., Lovell-Badge, R., Thisse, C.,  
1116 Thisse, B., and Raz, E. (2003). dead end, a novel vertebrate germ plasm component, is  
1117 required for zebrafish primordial germ cell migration and survival. *Curr. Biol. CB* 13,  
1118 1429–1434.
- 1119 White, R.J., Collins, J.E., Sealy, I.M., Wali, N., Dooley, C.M., Digby, Z., Stemple, D.L., Murphy,  
1120 D.N., Billis, K., Hourlier, T., et al. (2017). A high-resolution mRNA expression time course  
1121 of embryonic development in zebrafish. *ELife* 6.
- 1122 Wilhelm, J.E., Hilton, M., Amos, Q., and Henzel, W.J. (2003). Cup is an eIF4E binding protein  
1123 required for both the translational repression of oskar and the recruitment of Barentsz.  
1124 *J. Cell Biol.* 163, 1197–1204.
- 1125 Williamson, A., and Lehmann, R. (1996). Germ cell development in *Drosophila*. *Annu. Rev.*  
1126 *Cell Dev. Biol.* 12, 365–391.

- 1127 Wu, S.-F., Zhang, H., and Cairns, B.R. (2011). Genes for embryo development are packaged  
1128 in blocks of multivalent chromatin in zebrafish sperm. *Genome Res.* *21*, 578–589.
- 1129 Ying, Y., Qi, X., and Zhao, G.Q. (2001). Induction of primordial germ cells from murine  
1130 epiblasts by synergistic action of BMP4 and BMP8B signaling pathways. *Proc. Natl. Acad.*  
1131 *Sci. U. S. A.* *98*, 7858–7862.
- 1132 Yoon, C., Kawakami, K., and Hopkins, N. (1997). Zebrafish vasa homologue RNA is  
1133 localized to the cleavage planes of 2- and 4-cell-stage embryos and is expressed in the  
1134 primordial germ cells. *Dev. Camb. Engl.* *124*, 3157–3165.
- 1135 Zhang, B., Wu, X., Zhang, W., Shen, W., Sun, Q., Liu, K., Zhang, Y., Wang, Q., Li, Y., Meng, A.,  
1136 et al. (2018). Widespread Enhancer Dememorization and Promoter Priming during  
1137 Parental-to-Zygotic Transition. *Mol. Cell* *72*, 673-686.e6.
- 1138 Zhang, W., Liu, Y., Zhang, M., Zhu, C., and Lu, Y. (2017). Quantitative reproducibility  
1139 analysis for identifying reproducible targets from high-throughput experiments. *BMC*  
1140 *Syst. Biol.* *11*, 73.

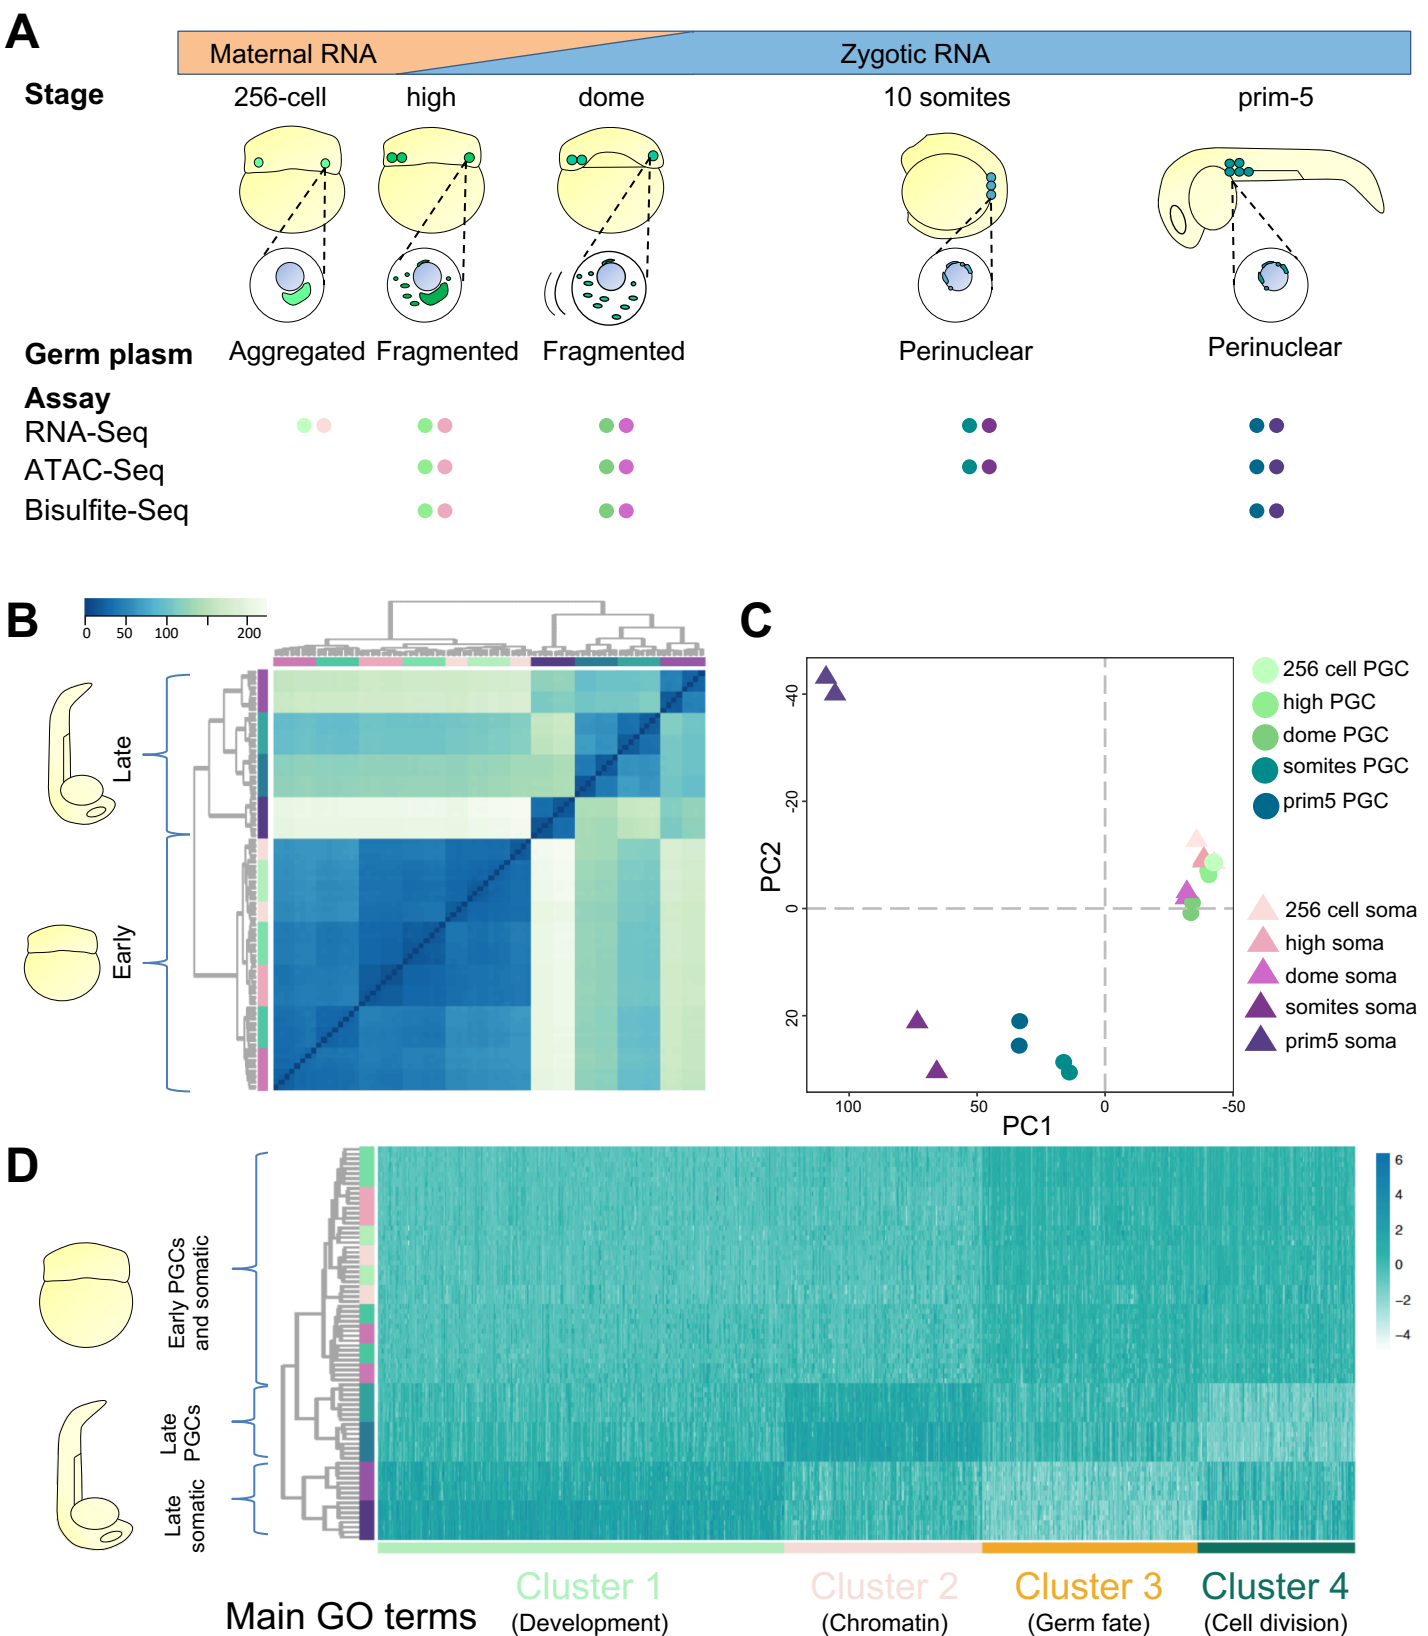

**Figure 1. Characterisation of PGC transcriptome highlights early developmental similarities and late divergence between PGCs and somatic cells.** (A) Key developmental stages used in the study are shown. Time points were selected according to various phases of germ plasm distribution/PGCs localisation. The early stages span zygotic genome activation including the first wave at 256-cell stage. NGS assays performed for each time point are shown as coloured dots; PGCs and somatic cells are in shades of green and purple respectively. (B-C) Unsupervised hierarchical clustering heatmap and two-dimensional PCA plot show developmental trends of PGC and somatic cell transcriptomes during development. (D) Four clusters of differential gene expression reported as heatmap upon k-mean-based clustering over development and cell type.



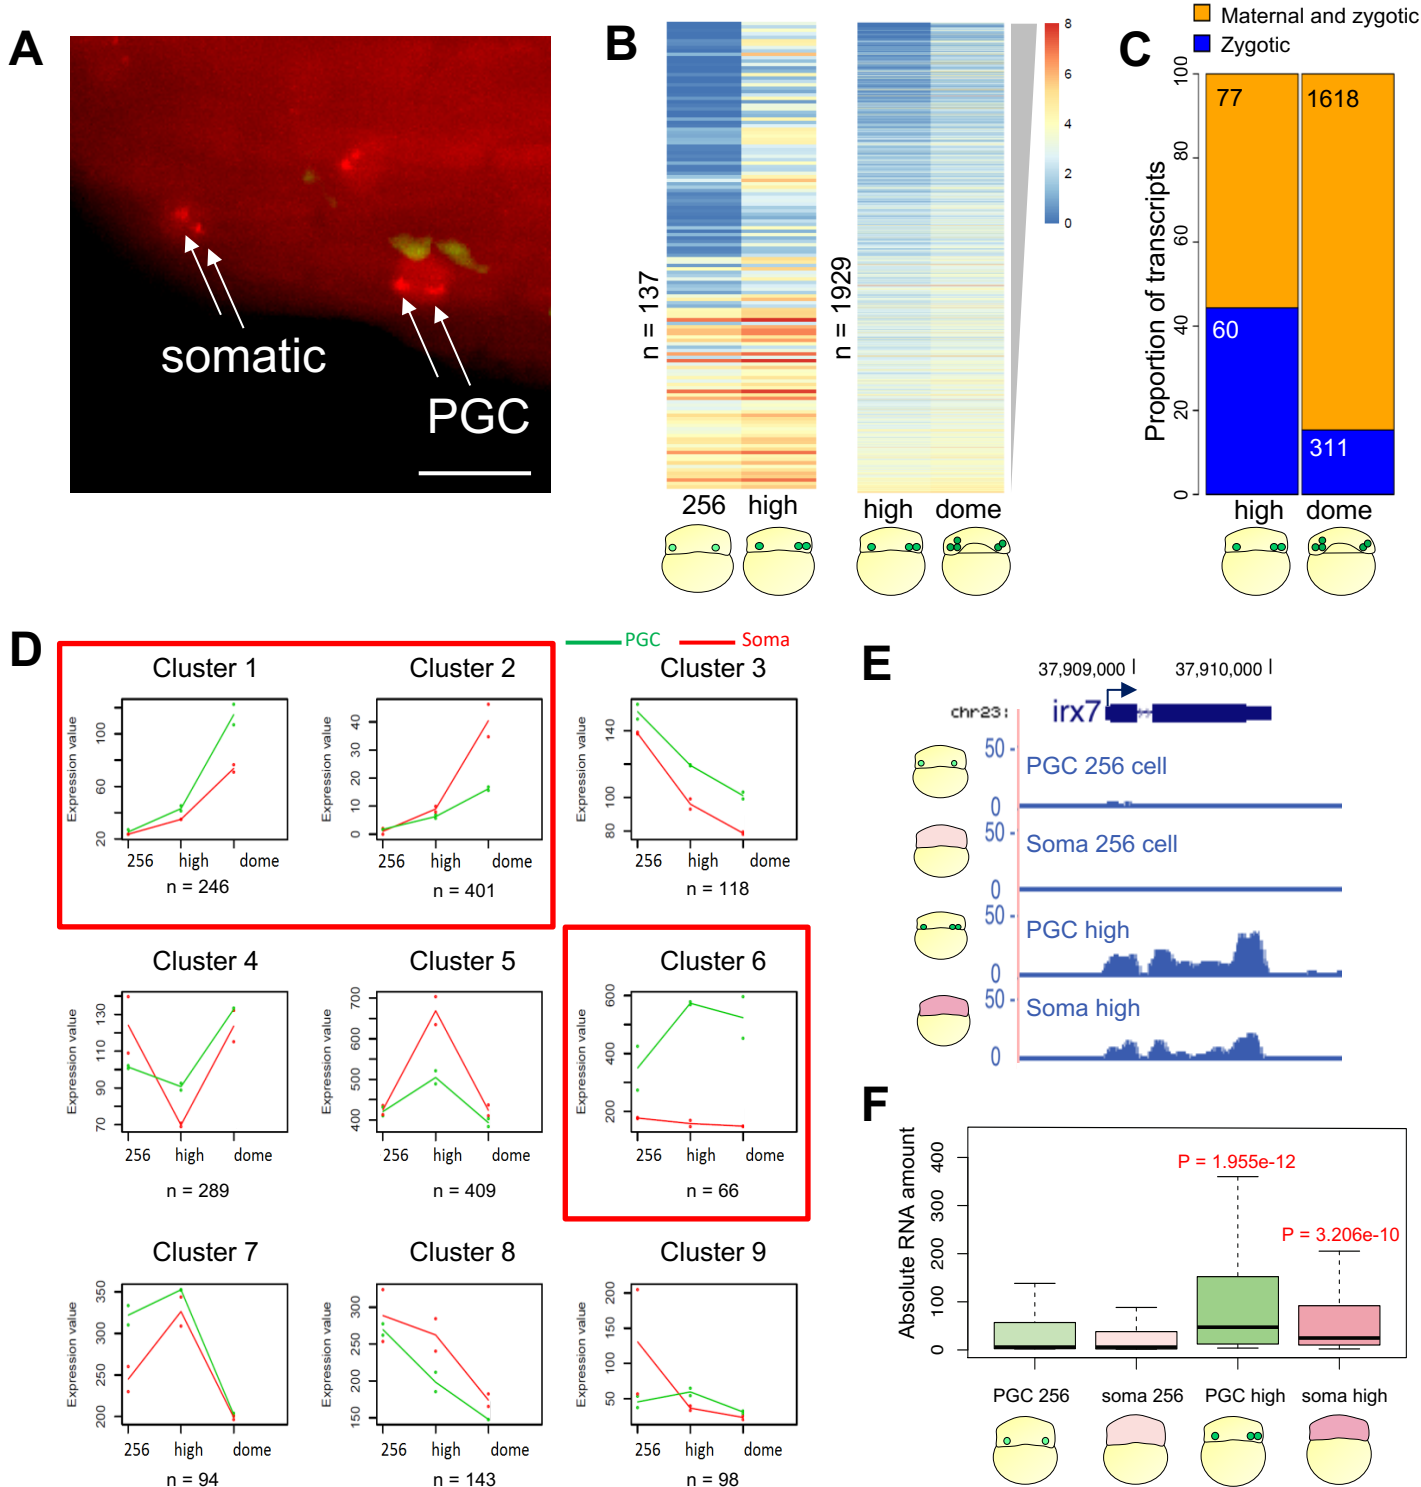

**Figure 2. PGCs do not delay the major wave of transcriptional activation.** (A) Maximum intensity projection of a multi-stack image showing *miR-430* transcription foci (arrows) detected by fluorescently-tagged Morpholinos (red) in germ plasm-carrying cells and somatic cells at 512-cell stage. Germ plasm-localised GFP-Buc (green) marks PGCs. Scale bar is 30  $\mu$ m. (B) Heatmap of upregulated genes sorted by log<sub>2</sub>FC in the germ plasm-carrying cells between 256-cell and high stages and high and dome stages. Colours represent the log<sub>2</sub>(tpm+1). P adjusted < 0.1. (C) Proportion of zygotic and maternal/zygotic genes upregulated in the germ plasm-carrying cells at high and dome stages. (D) Clusters of gene expression trends among three developmental stages in PGCs and somatic cells. Median profiles of gene expression values are plotted for each trend in green (PGCs) and red (somatic cells) and represent the gene read counts normalised by the DESeq2-calculated size factor. Red squares highlight clusters supporting transcriptional activation in the PGCs. (E) Genome browser view of normalised RNA-seq reads for *irx7* gene. (F) Absolute RNA concentration normalised to internal control (ERCC spike-in) for genes upregulated in germ plasm-carrying cells between 256-cell and high stage. P-values are calculated by Wilcoxon test.

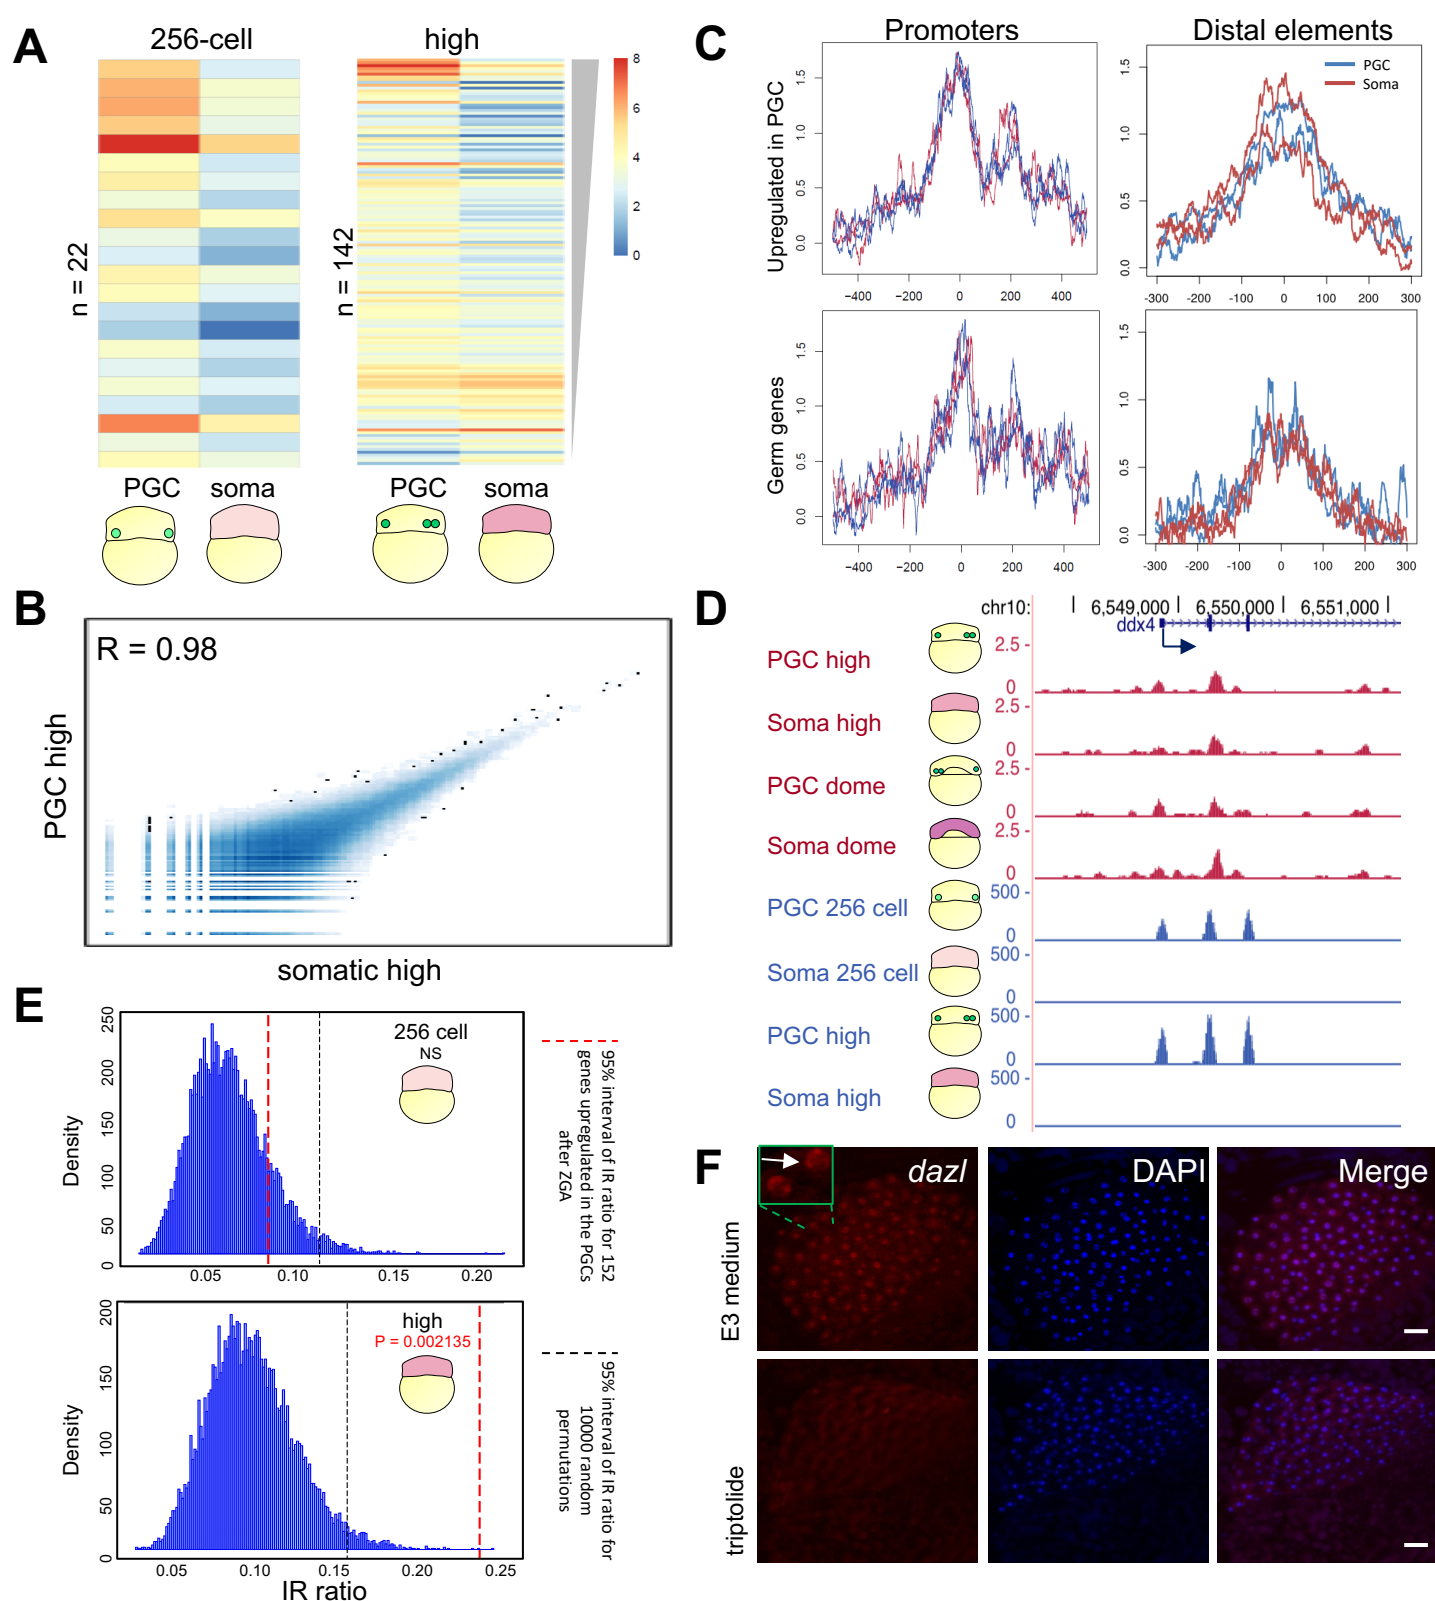

**Figure 3. Differential transcriptome between PGCs and somatic cells at early stages is not caused by differential transcription.**

(A) Heatmap of differentially expressed genes sorted by  $\log_2FC$  between PGCs and somatic cells at 256-cell and high stage. Colours represent  $\log_2(tpm+1)$  values. P adjusted < 0.05. (B) Correlation plot for open chromatin regions detected in PGCs and somatic cells at high stage. (C) Average accessibility signal at promoters and distal elements of PGC and somatic cells for subgroups of genes at high stage. Promoters are aligned to transcription start site, while distal elements are aligned to peak centre. (D) Genome browser view of normalised ATAC-seq (magenta) and RNA-seq (blue) reads for PGC and somatic cells at stages spanning ZGA. (E) Intron retention ratio before and after ZGA in the somatic cells of genes upregulated in the PGCs after ZGA. P-value is calculated by t-test. Statistical significance was calculated upon 10000 random permutation whose density is shown before and after ZGA. Black and red dashed lines show 95% significance interval for the 10000 permutations and the gene subgroup respectively. NS = not significant. (F) In-situ hybridization for *dazl* pre-mRNA at high stage. Scale bar is 50  $\mu m$ .

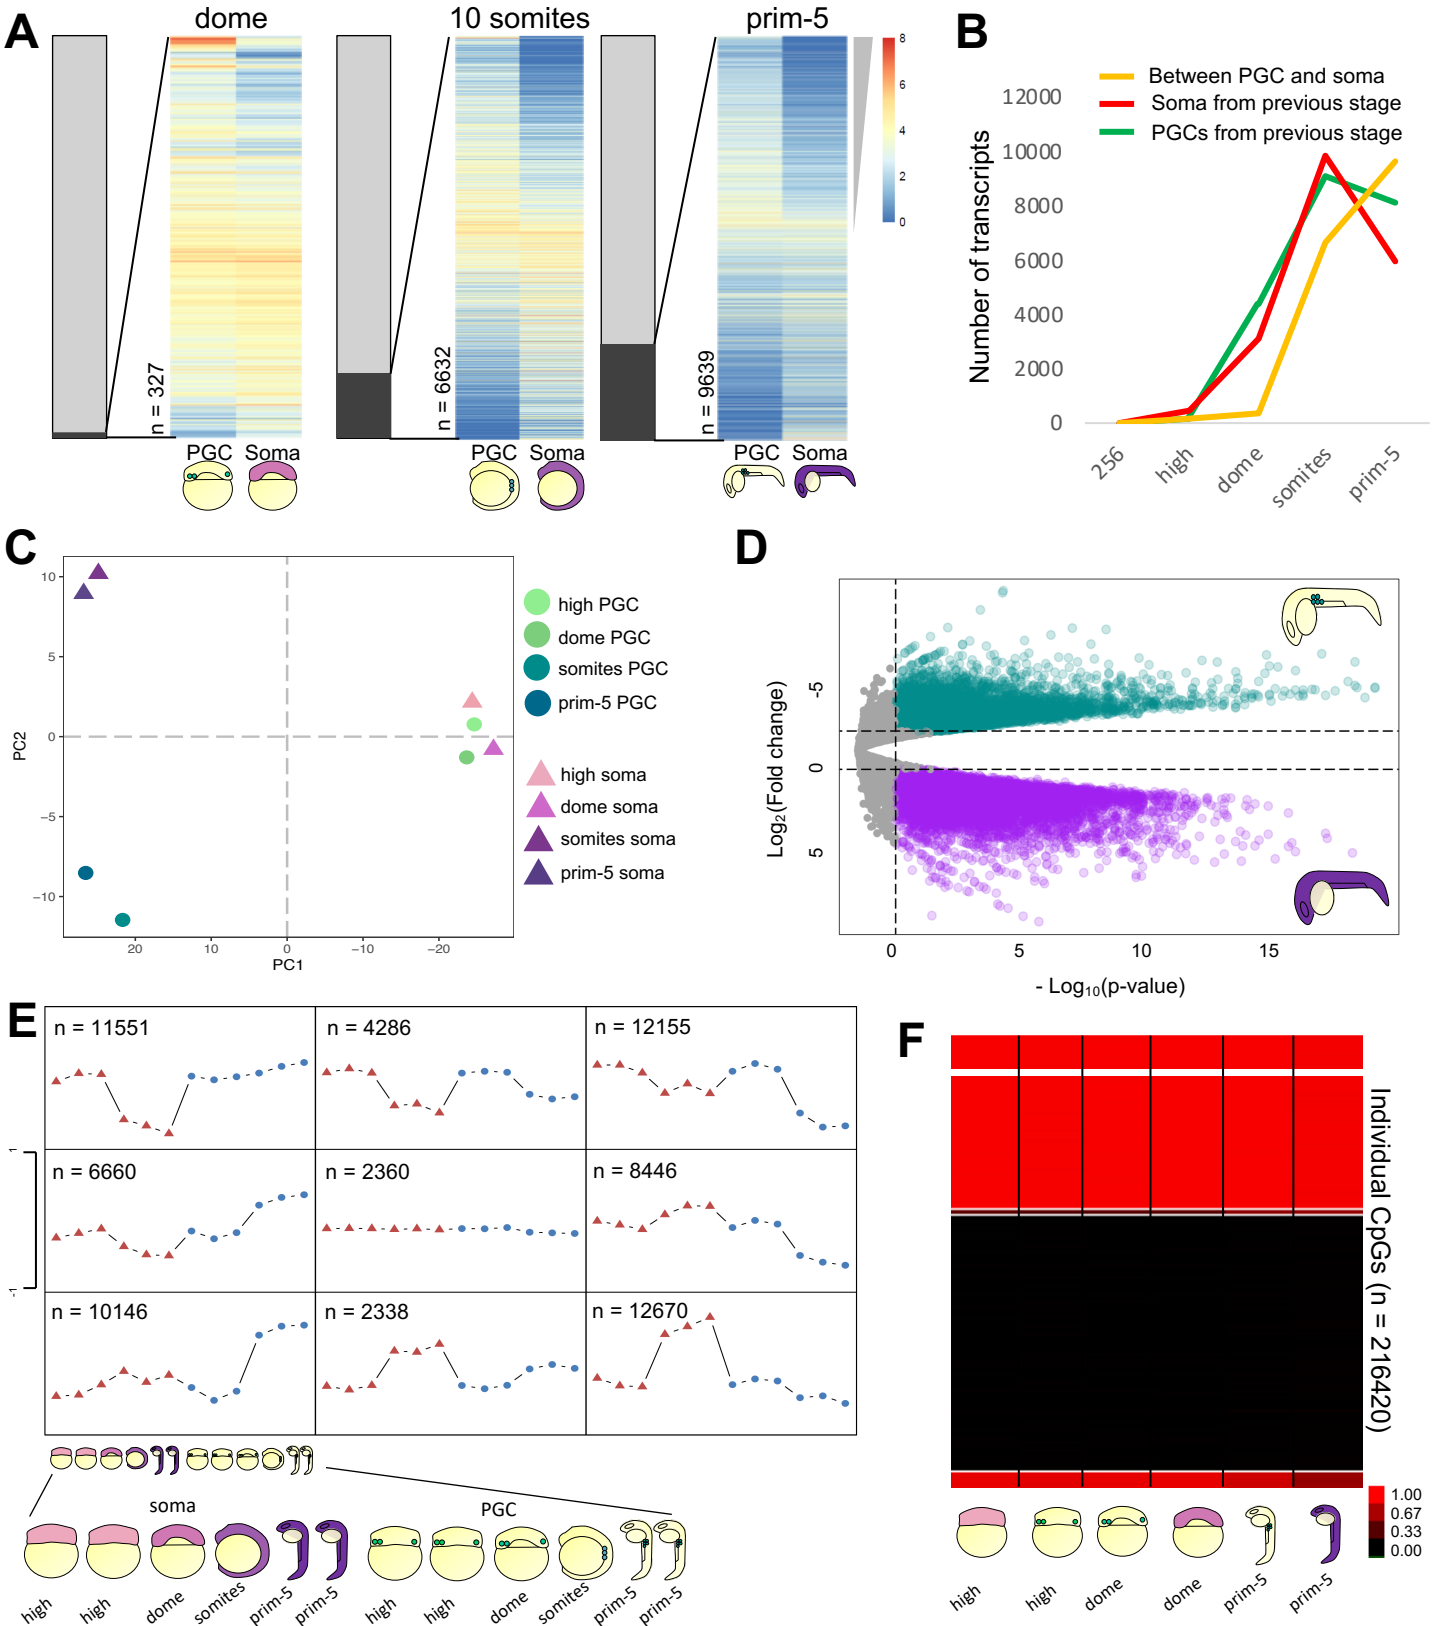

**Figure 4. Gradual acquisition of germ identity is accompanied by epigenetic changes.** (A) Heatmap of differentially expressed genes sorted by  $\log_2FC$  between PGCs and somatic cells. Grey bars represent the proportion of differentially expressed genes over the total transcriptome. Colours represent  $\log_2(tpm+1)$  values. (B) Line-chart for gene counts. Upregulated genes from previous stage are in red (somatic) or green (PGCs). The orange line shows number of genes differentially expressed between PGCs and somatic cells at each stage. (C) Two-dimensional PCA plot of ATAC-seq profiles. (D) Volcano plot for regions of open chromatin between PGCs and somatic cells at prim-5 stage ( $\log_2FC$  threshold =  $\pm 1$ ,  $p$  adjusted  $< 0.05$ ). (E) Self-organising map of open chromatin regions. PGCs and somatic cells are shown as blue circles and red triangles respectively. Schematic of embryos as in Figure 1A and 1B (F) Methylation status in identified CpGs in PGCs and somatic cells at dome and prim-5 stages.

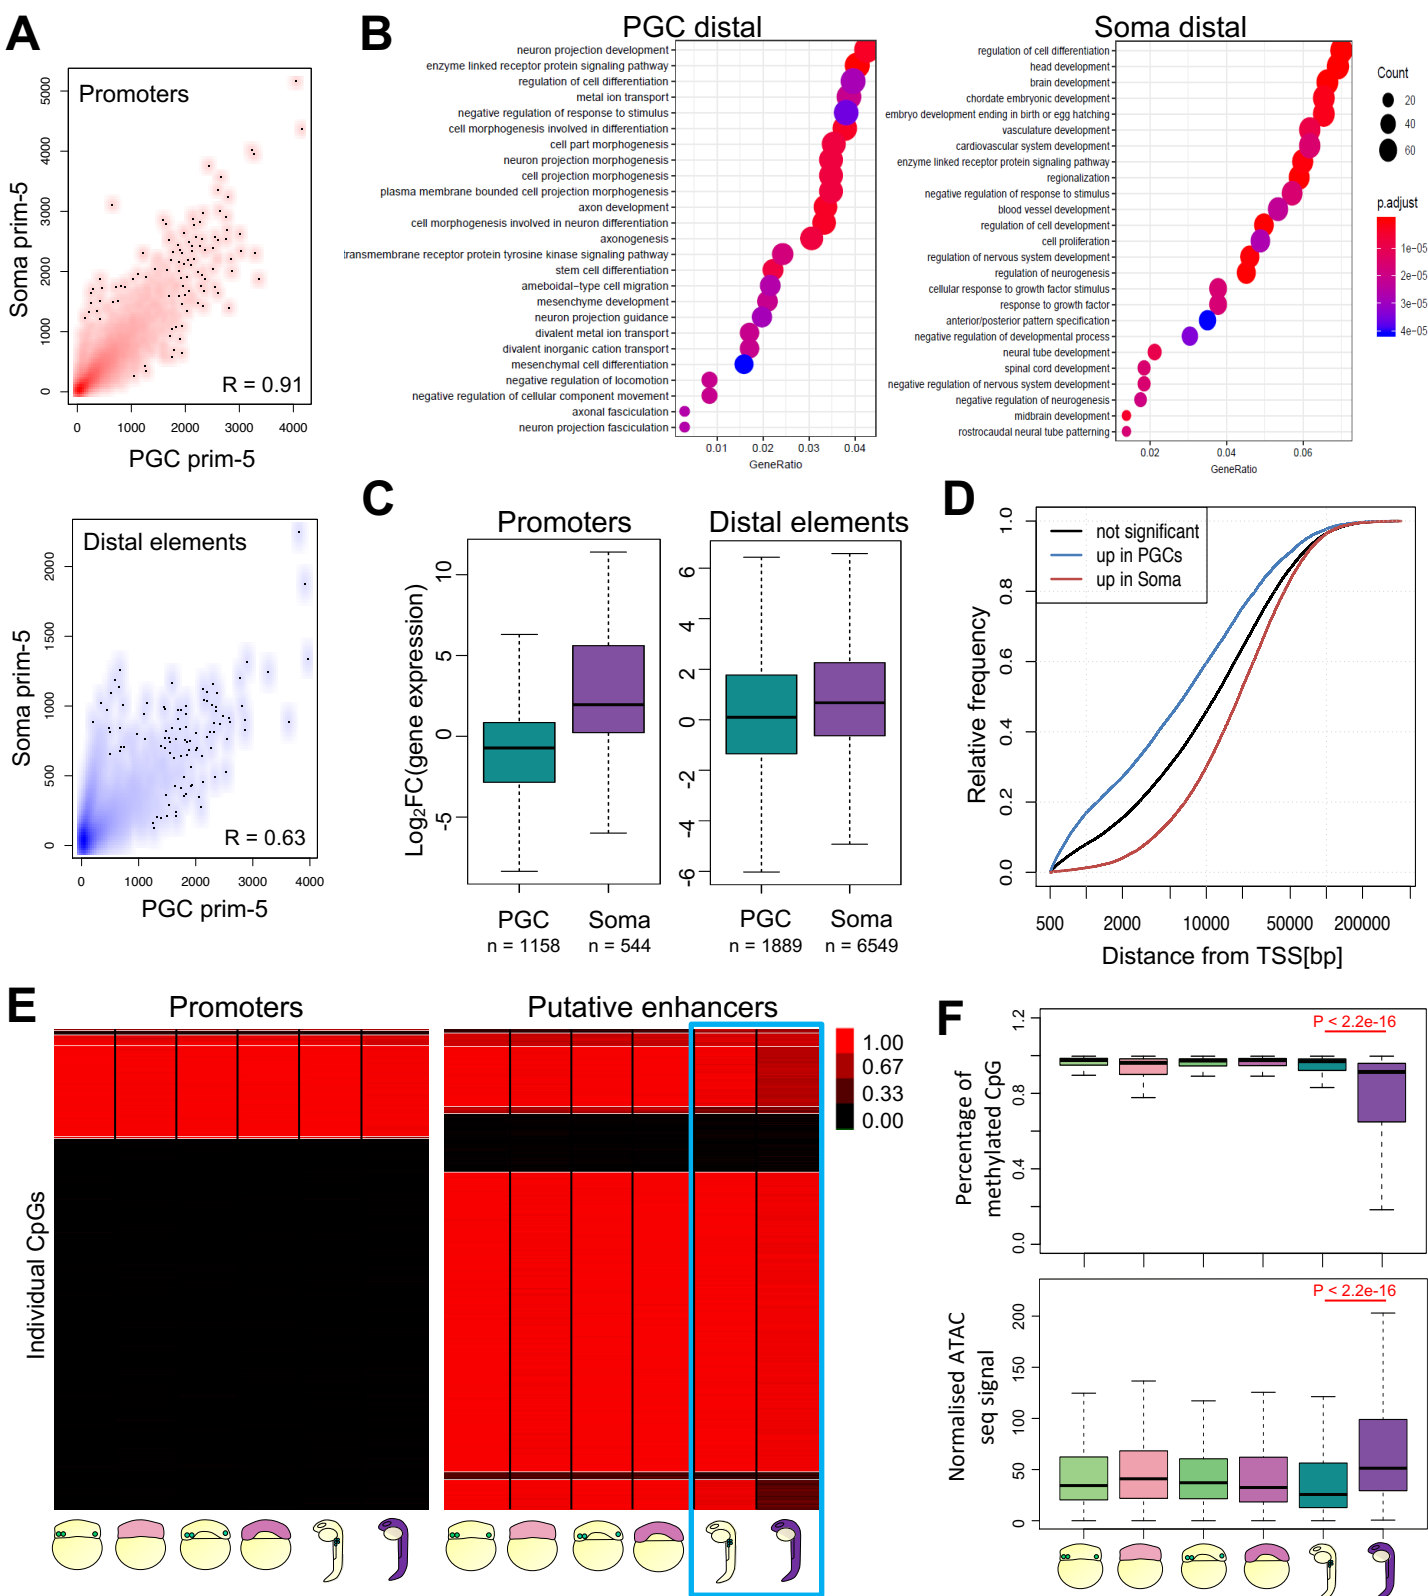

**Figure 5. PGCs do not open chromatin at regions identified as putative enhancers.** (A) Correlation scatter plots of ATAC peaks between PGCs and somatic cells for promoters and distal elements at prim-5 stage. (B) Developmental processes GO analysis for genes associated with differential chromatin accessible putative enhancers in PGCs and somatic cells. (C) Fold change of gene expression for genes associated with ATAC peaks upregulated in PGCs and somatic cells respectively. Negative and positive fold changes represent gene upregulation in PGCs and somatic cells respectively. (D) Cumulative frequency of open chromatin elements in relation to distance from the closest TSS. P adjusted < 0.05. Colours indicate elements near differentially expressed genes as indicated. (E) Heatmap of DNA methylation for CpGs overlapping promoters (left) and H3K4me1/H3K27ac-rich genomic sites (putative enhancers) in PGCs and somatic cells at high, dome and prim-5 stages. Light blue box highlights putative enhancers at prim-5 stages. (F) Quantification of methylated CpGs and chromatin accessibility at putative enhancer regions. P-value was calculated by Wilcoxon test. Outlier are omitted.

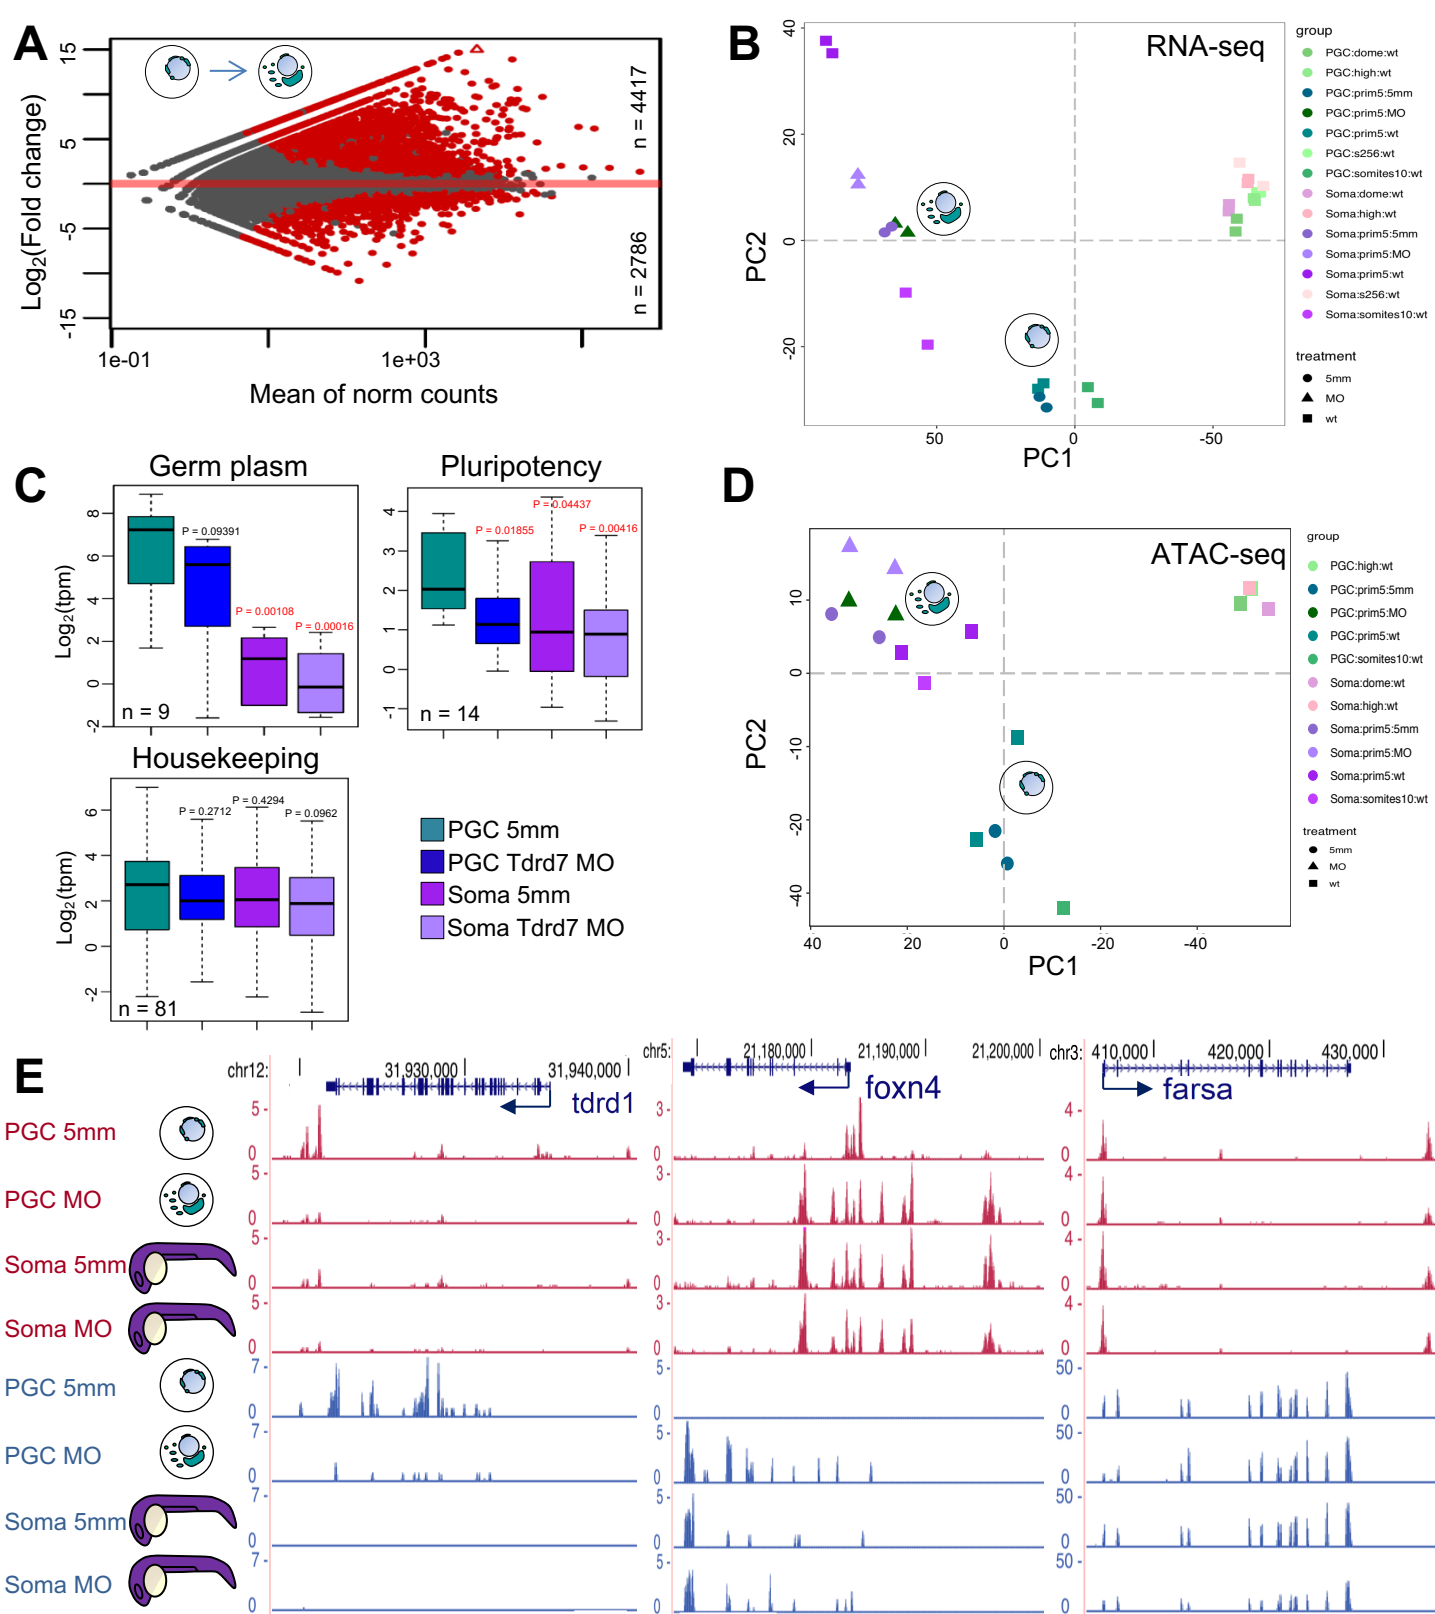

**Figure 6. Tdrd7 is required for maintaining PGC fate.** (A) Differential expression analysis for genes upregulated and downregulated by Tdrd7 KD in PGCs at prim-5 stage. Significantly differentially expressed genes are in red. P adjusted < 0.1,  $\log_2FC < -1/> 1$ . (B) Global transcriptional variance shown as PCA plot for wild type and MO-injected PGCs and somatic cells. (C) Boxplots reporting normalised transcript levels (tpm values) for various gene subsets in MO-injected PGCs and somatic cells. P-values against control is shown. Red colour indicates significance ( $p < 0.05$ ) based on Wilcoxon test. (D) PCA plots for only promoters and putative enhancers show PGCs diverging towards somatic-like chromatin state. (E) Genome browser view of ATAC profiles after morpholino injections. Open chromatin (ATAC-seq) is shown in magenta and transcript levels (RNA-seq) are shown in blue. Arrows show transcriptional directionality.

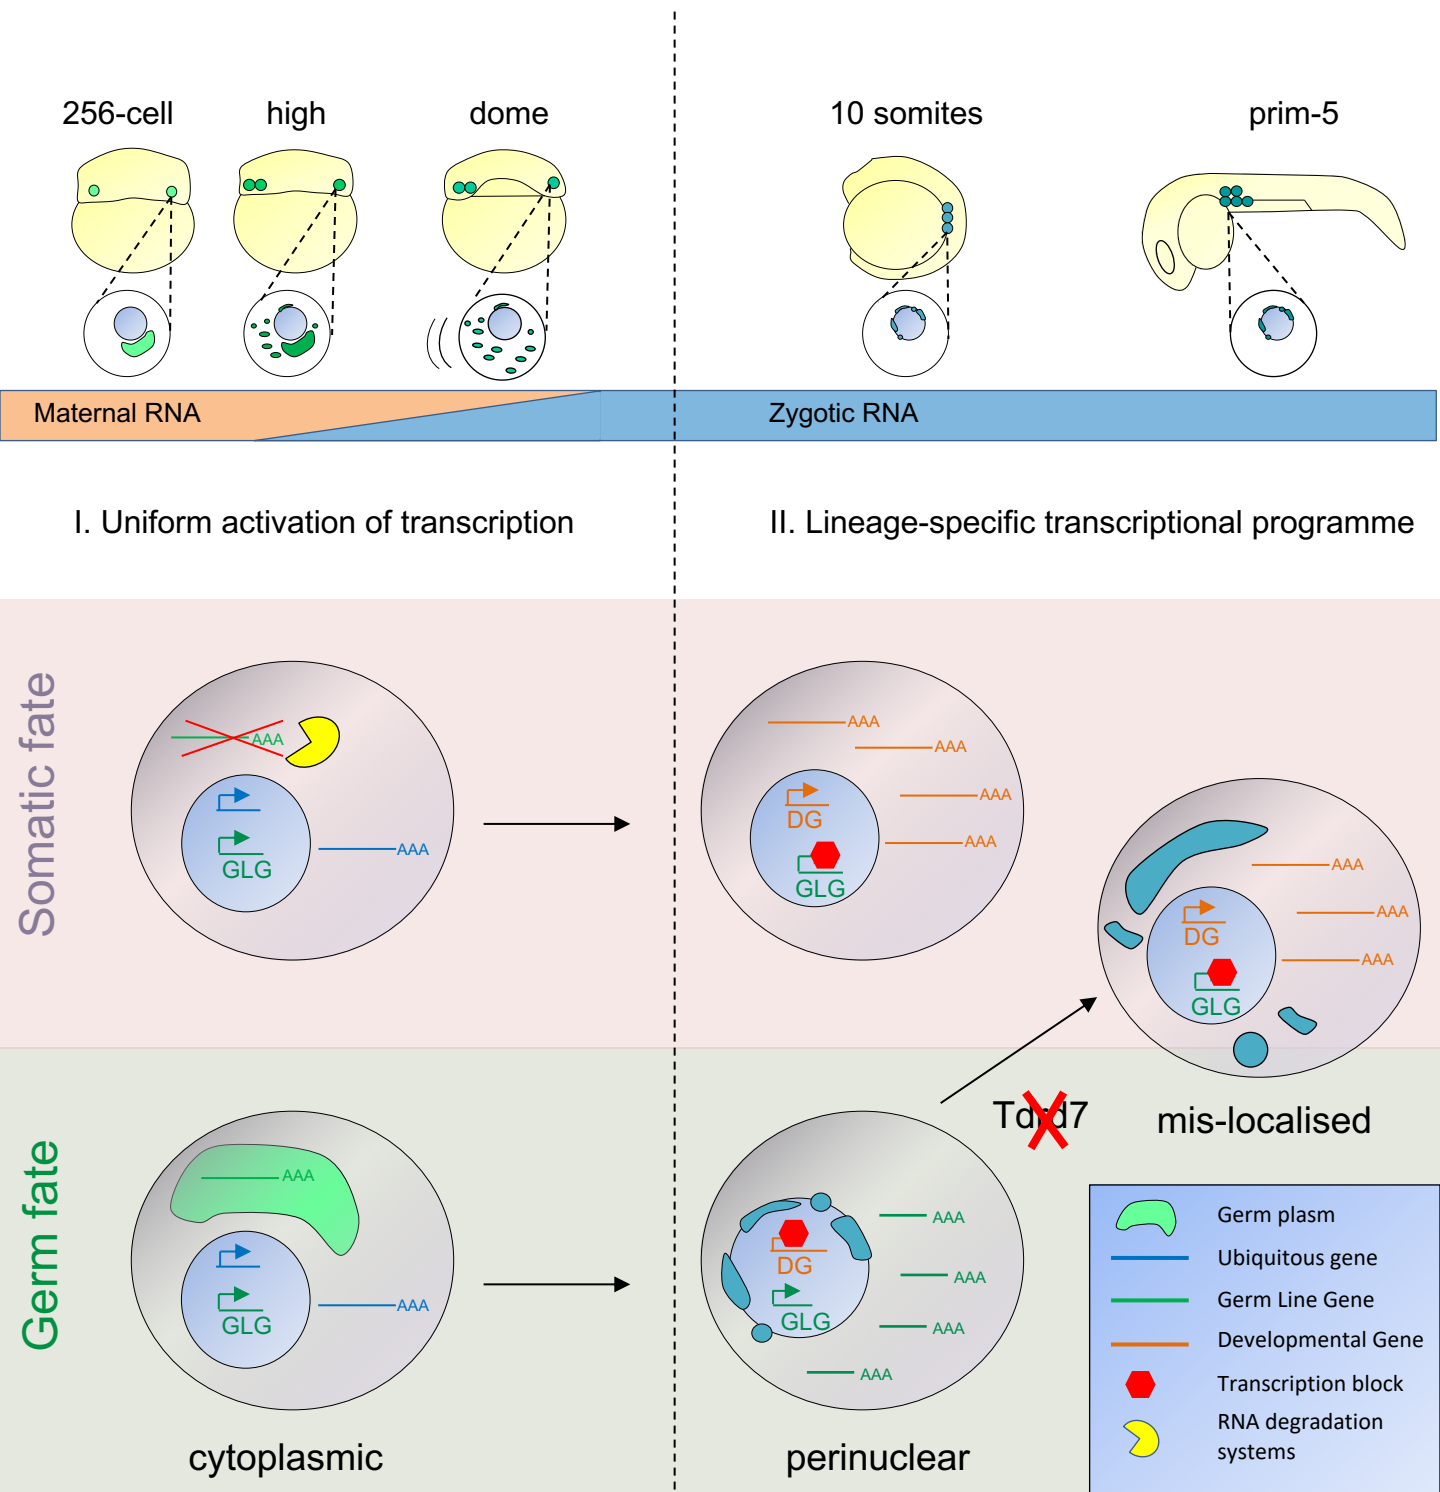

**Figure 7. Two functions of the germ plasm during germ fate acquisition.** During zygotic genome activation, both somatic cells and PGCs activate the genome similarly, including the activation of PGC specific genes. However, PGC specific genes are only stabilised in germ plasm-containing cells upon protection from the zygotic degradation machinery (yellow). During PGC migration, germ plasm components re-localise to the nuclear membrane. This coincides with acquisition of a PGC-specific transcriptional programme, involving transcriptional repression of developmental pathways blocking somatic differentiation. This process is Tdrd7 dependent as indicated by loss of germ plasm re-localisation and reactivation of somatic transcriptional programmes.

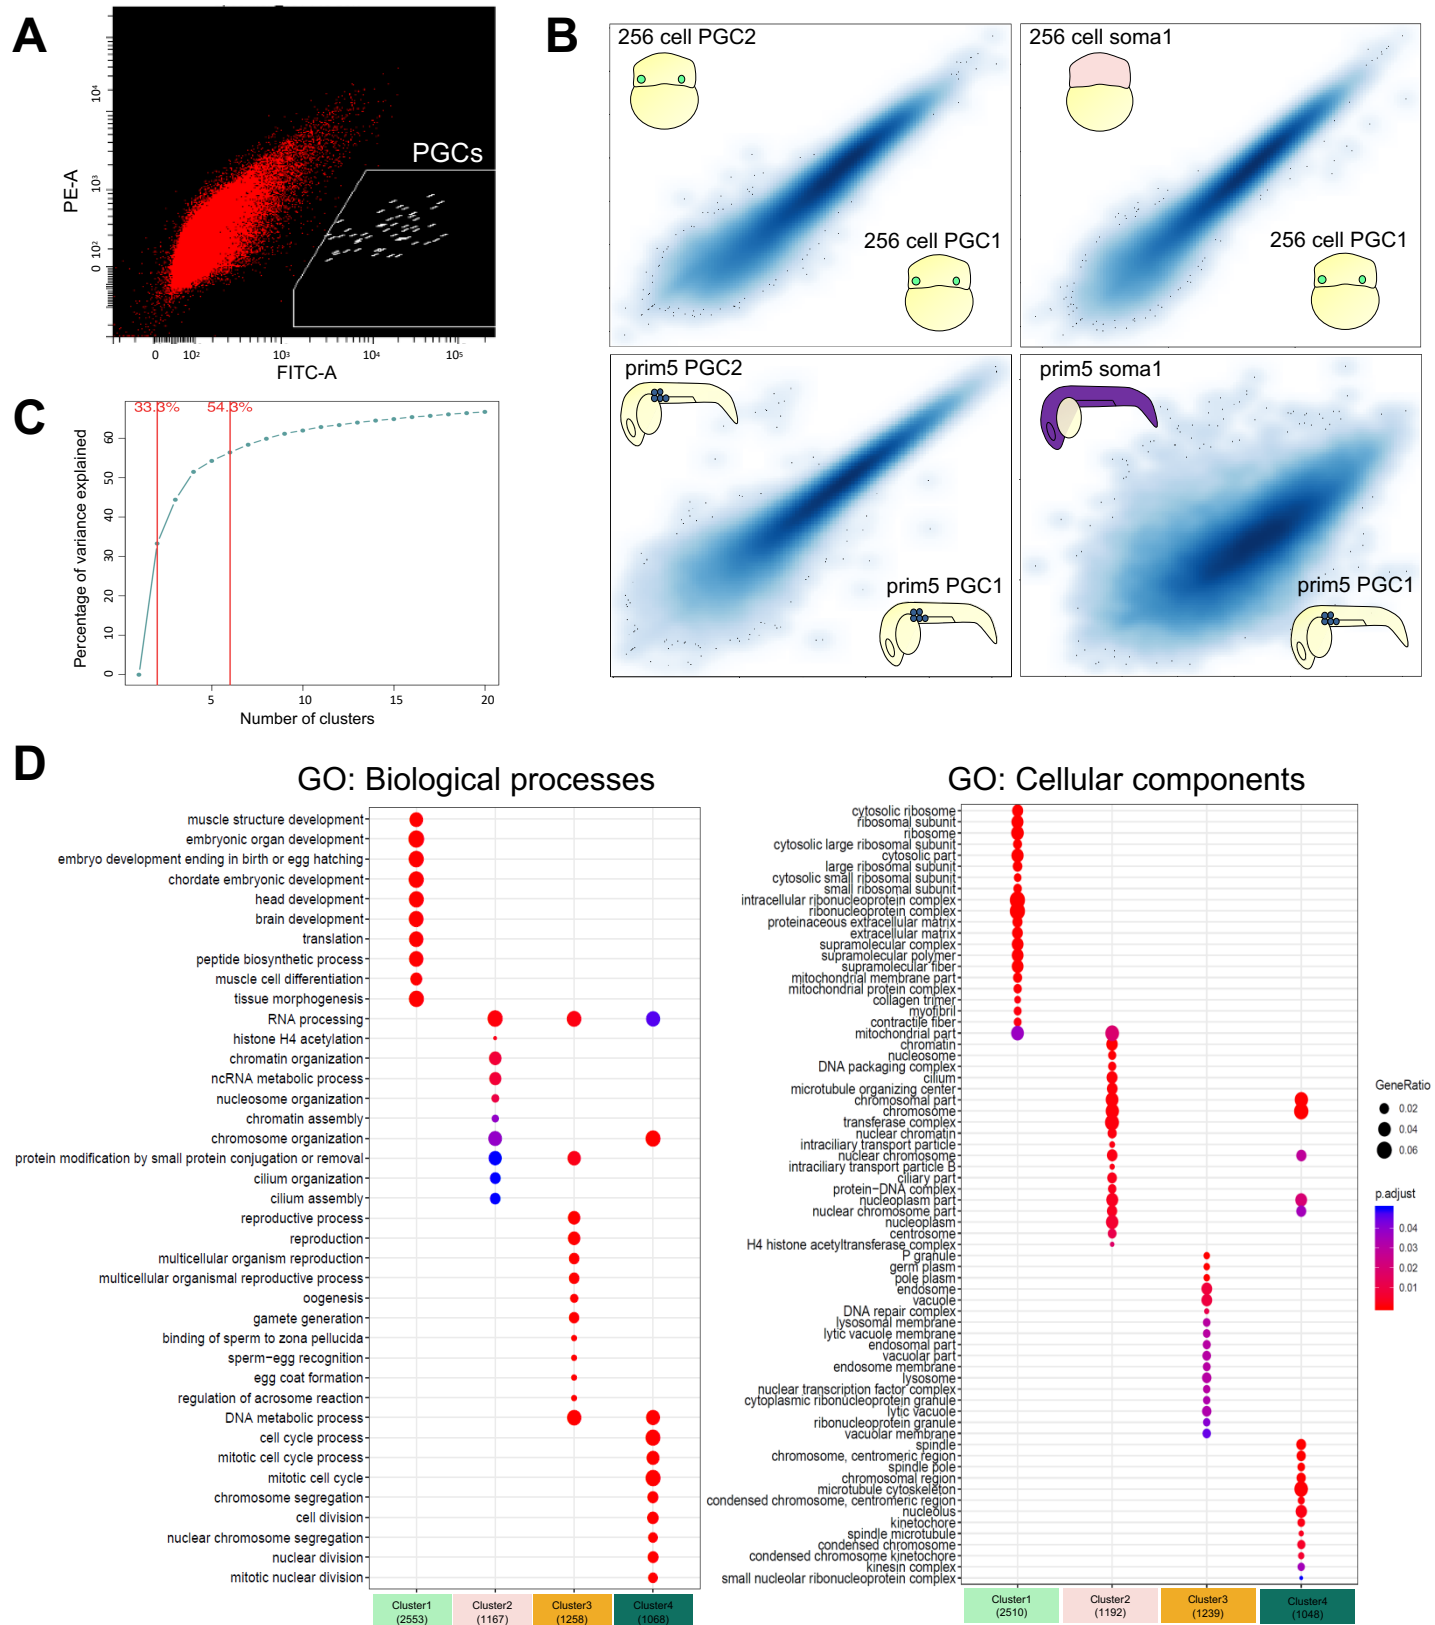

**Supplementary Figure 1. Characterisation of PGC transcriptome highlights early developmental similarities and late divergence between PGCs and somatic cells.** (A) FACS profile of GFP-expressing PGCs at prim-5 stage. GFP-positive and -negative cells are in white and red respectively. (B) Transcriptome correlation profiles after RNA-seq reads normalisation. Read counts for each gene were normalised for library size and gene length (tpm) and correlation among stages and cell types were compared. Reads are shown as  $\text{Log}_2(\text{tpm}+1)$ . (C) Justification of number of k-means selected based on inter-sample variance. (D) Biological processes and cellular components GO analysis for the four identified expression groups by k-mean clustering (p adjusted < 0.05).

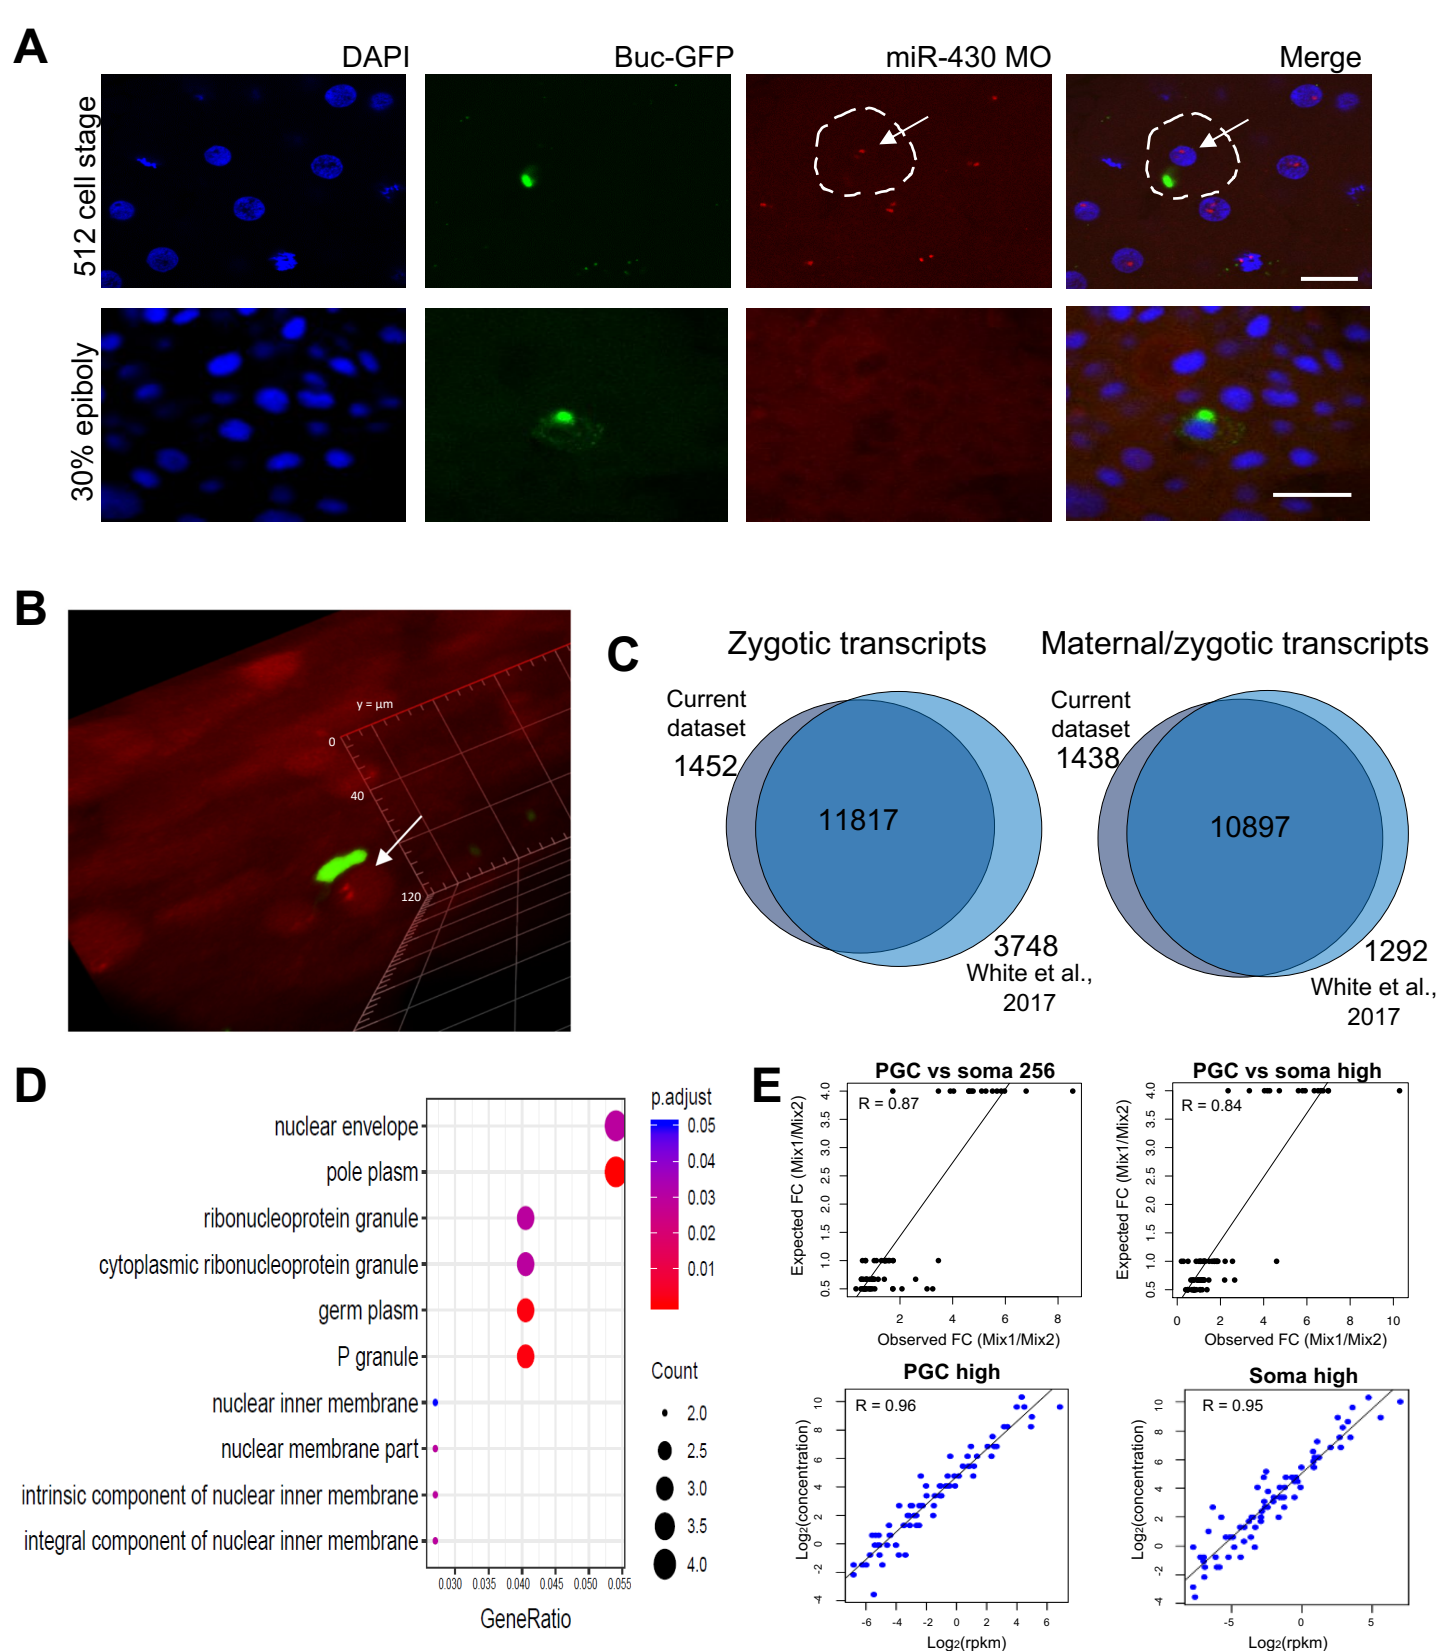

**Supplementary Figure 2. PGCs do not delay transcriptional activation.** (A) Maximum intensity projection of a multi-stack image of *miR-430* transcriptional activity at 512-cell stage and 30% epiboly. PGC boundaries are highlighted as white, dashed lines. Arrow indicates the nucleus of a germ plasm-carrying cell where transcriptional foci are detected. Scale bar is 30  $\mu\text{m}$ . (B) 3D rendering of a *miR-430*-expressing nucleus (arrow) and a GFP-tagged germ granule. White arrow indicates the germ cell nucleus. (C) Venn diagram for predicted zygotic/maternal and zygotic genes from two independent RNA-seq datasets. (D) Cellular components GO analysis for genes upregulated in PGCs after the first wave of ZGA (from 256-cell to high stage). P adjusted < 0.05. (E) Representative regression scatter plots between expected vs observed ERCC mix ratios (top) and ERCC concentrations vs ERCC reads (bottom). The tpm threshold for normalised ERCC reads was 1.



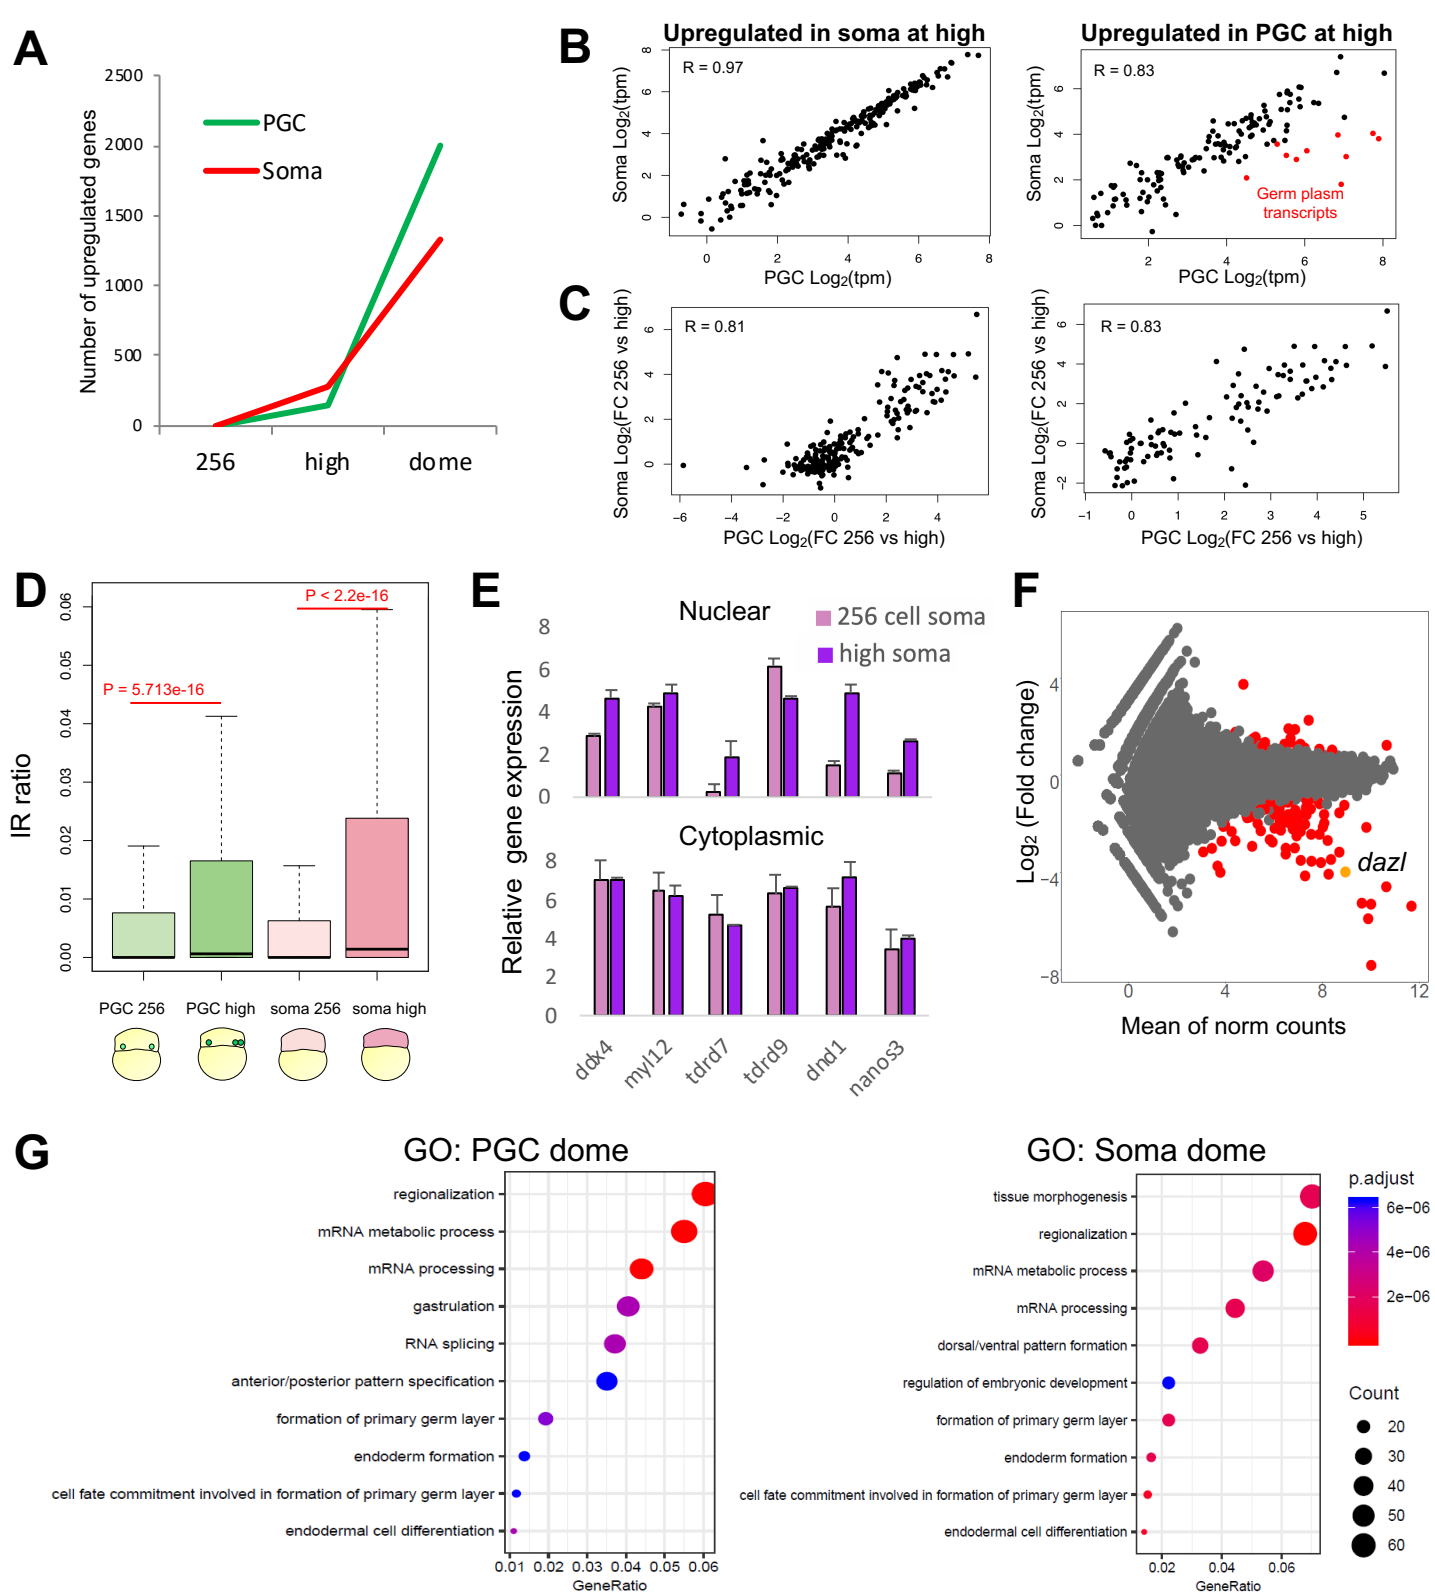

**Supplementary Figure 3. Differential transcriptome between PGCs and somatic cells at early stages is not caused by differential transcription.** (A) Count of upregulated genes from previous stage in PGCs and somatic cells at high and dome stages. (B) Correlation of normalised RNA-seq reads (tpm) for genes upregulated from the previous stage in the PGCs or somatic cells only at high stage. Germ plasm genes are in red. (C) Correlation between fold change increases from 256-cell to high stages in PGCs and somatic cells for gene subsets. (D) Intron retention ratio for all transcripts in PGCs (green) and somatic cells (purple) before and after ZGA. T-test was used to calculate p-values. (E) Relative gene expression fold change normalised to a reference gene in somatic cells for nuclear and cytoplasmic fractions. Error bars show standard errors. (F) Differential expressed genes between 256-cell and high stages in PGCs. Significantly differentially expressed genes are in red. P adjusted  $< 0.1$ ,  $\text{log}_2\text{FC} < -1 / > 1$ . (G) Biological processes GO analysis for genes upregulated from high to dome in PGCs (left) and somatic cells (right).

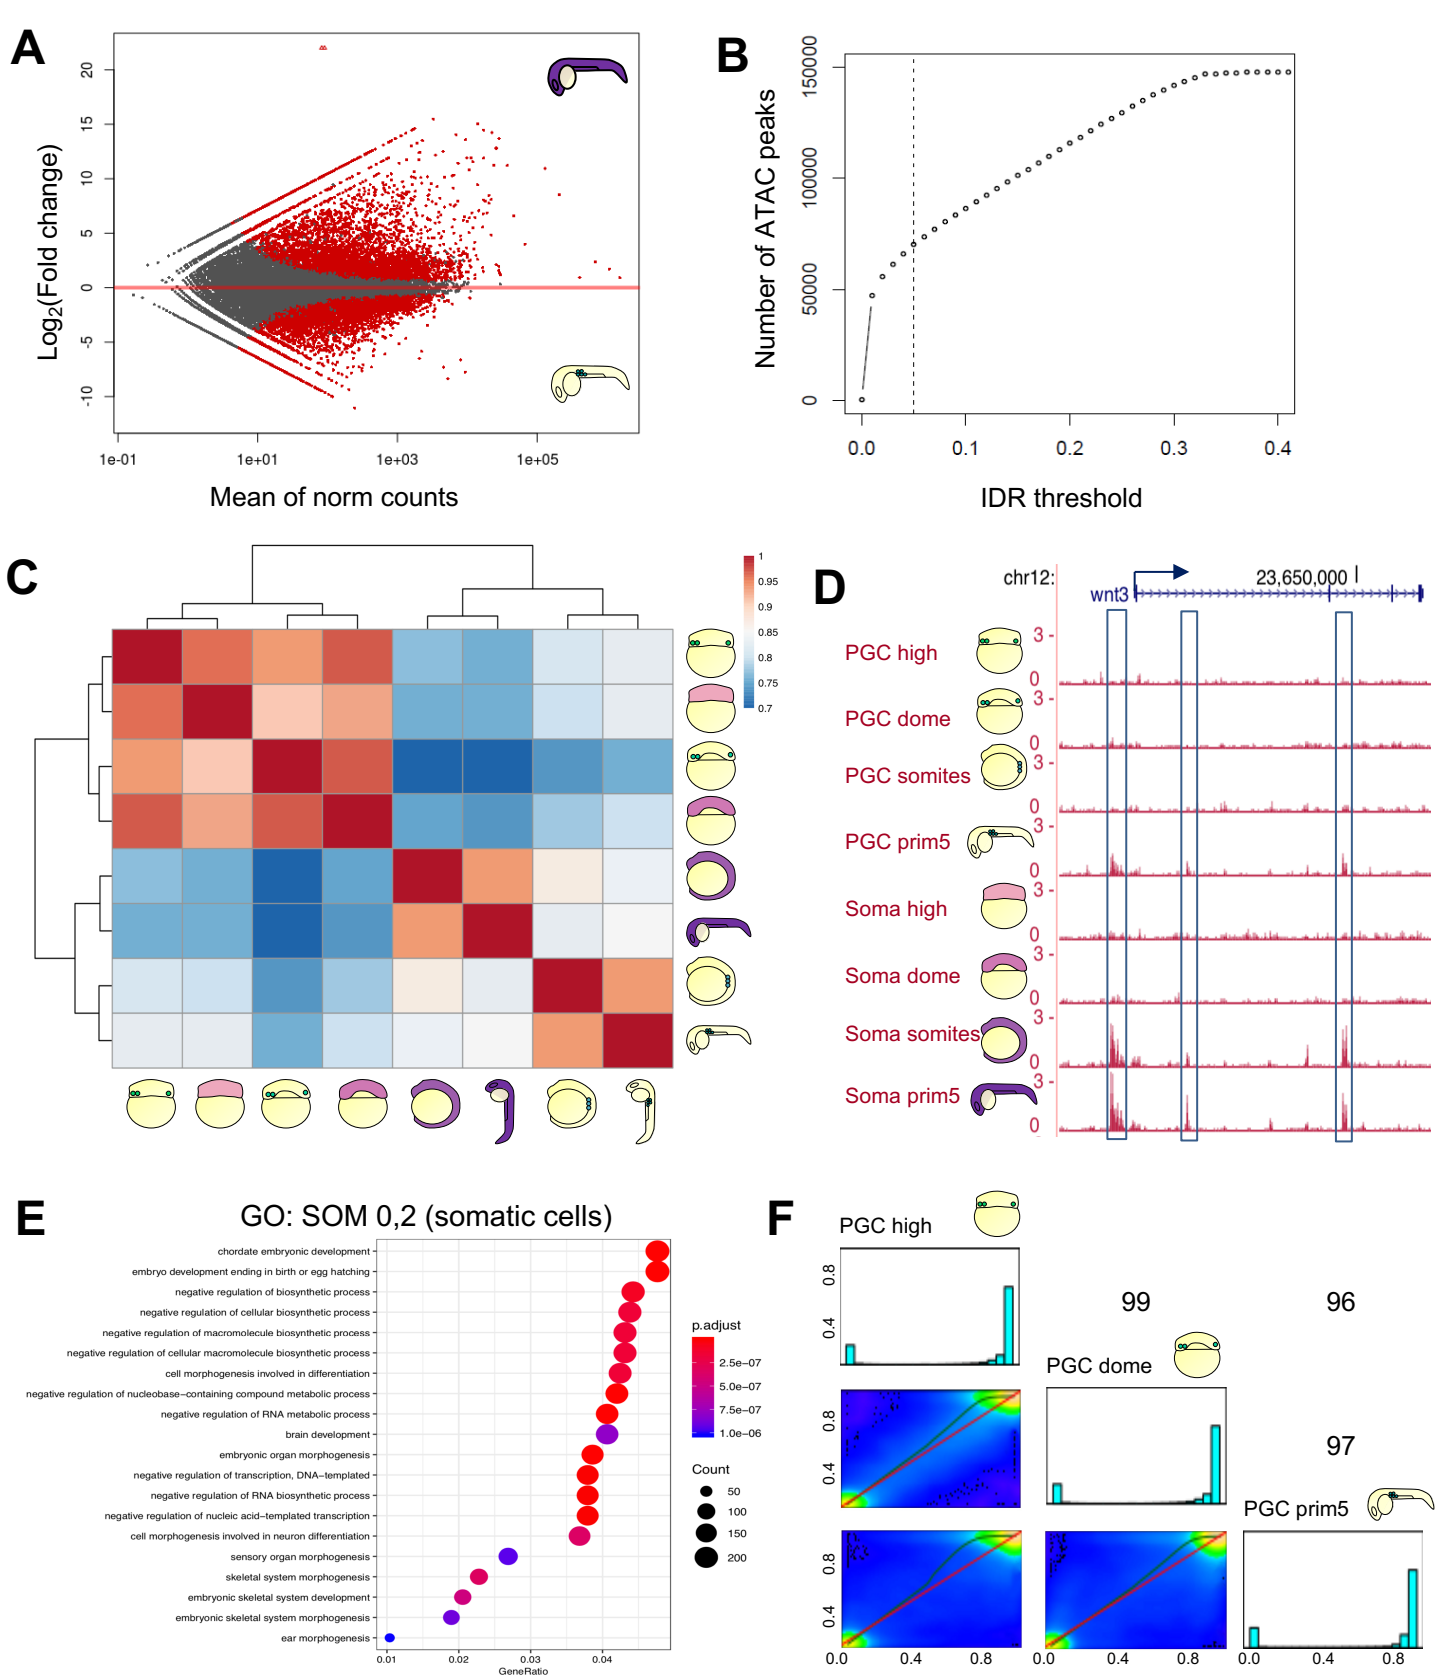

**Supplementary Figure 4. Gradual acquisition of germ identity is accompanied by epigenetic changes.** (A) Differentially expressed genes in PGCs and somatic cells at prim-5 stage. Significantly differentially expressed genes are in red. P adjusted < 0.1. (B) Reproducible ATAC peaks identified in function of the IDR threshold. (C) Unsupervised correlation heatmap for developmental stages and cell types after selection of reproducible ATAC peaks. (D) Genome browser view showing ATAC-seq tracks (magenta) of *wnt3* gene in PGCs and somatic cells across early development. Blue boxes highlight putative regulatory elements. Arrows show transcriptional directionality. (E) GO terms for genes associated with open chromatin regions upregulated in late somatic cells. (F) CpG base Pearson correlation shown as heatmap and histogram of CpG frequency.

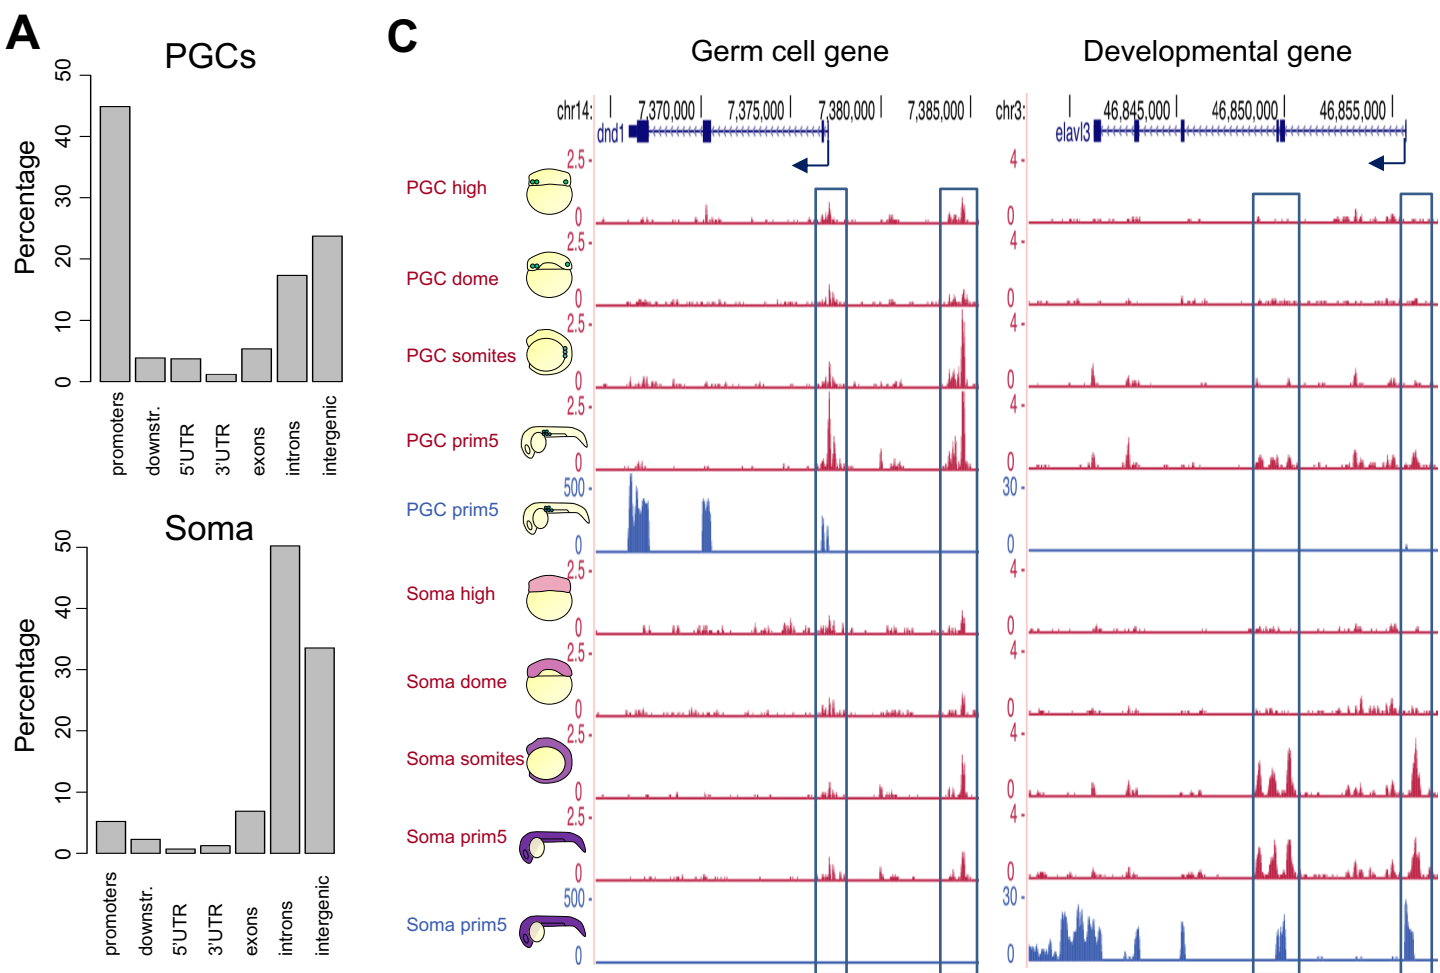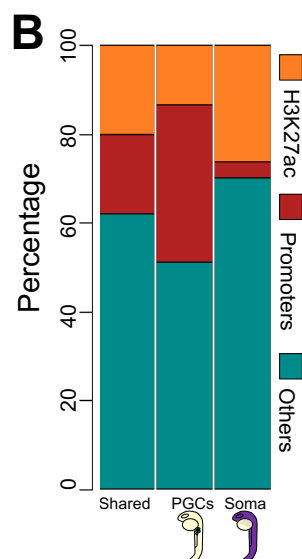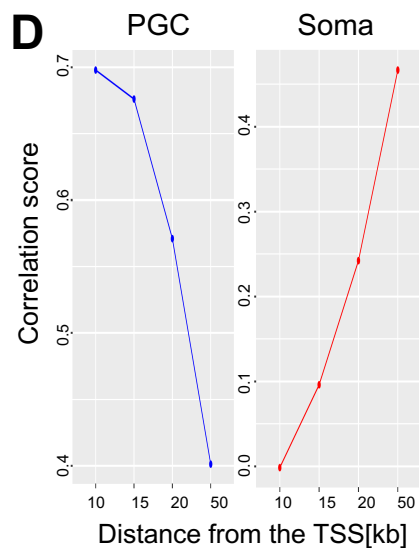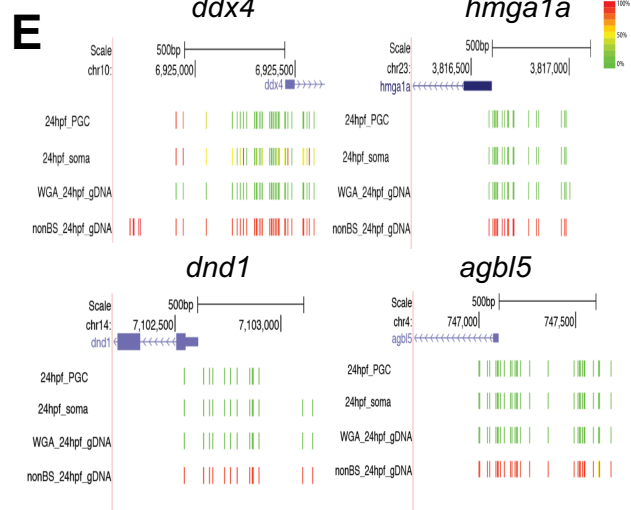

**Supplementary Figure 5. PGCs do not open chromatin at regions identified as putative enhancers.** (A) Percentage of differentially accessible ATAC peaks in PGCs and somatic cells at prim-5 stage overlapping gene features. Promoters include 1kb up- and downstream from the TSS. (B) Genome browser view of open chromatin regions (ATAC-seq in magenta) and transcript levels (RNA-seq in blue) in PGCs and somatic cells. Blue boxes highlight putative regulatory elements or promoters. Arrows show transcriptional directionality. (C) Percentage of ATAC peaks associated with H3K27ac and promoters in PGCs and somatic cells at prim-5 stage. (D) Correlation score between chromatin accessibility and gene transcription in function of distance from the TSS. Correlation score is represented as the absolute ATAC log<sub>2</sub>FC value associated to genes upregulated in PGCs (blue) or somatic cells (red) (E) Genome browser view of four representative promoters upregulated in late PGCs versus somatic cells. CpG methylation levels are reported as coloured bars.

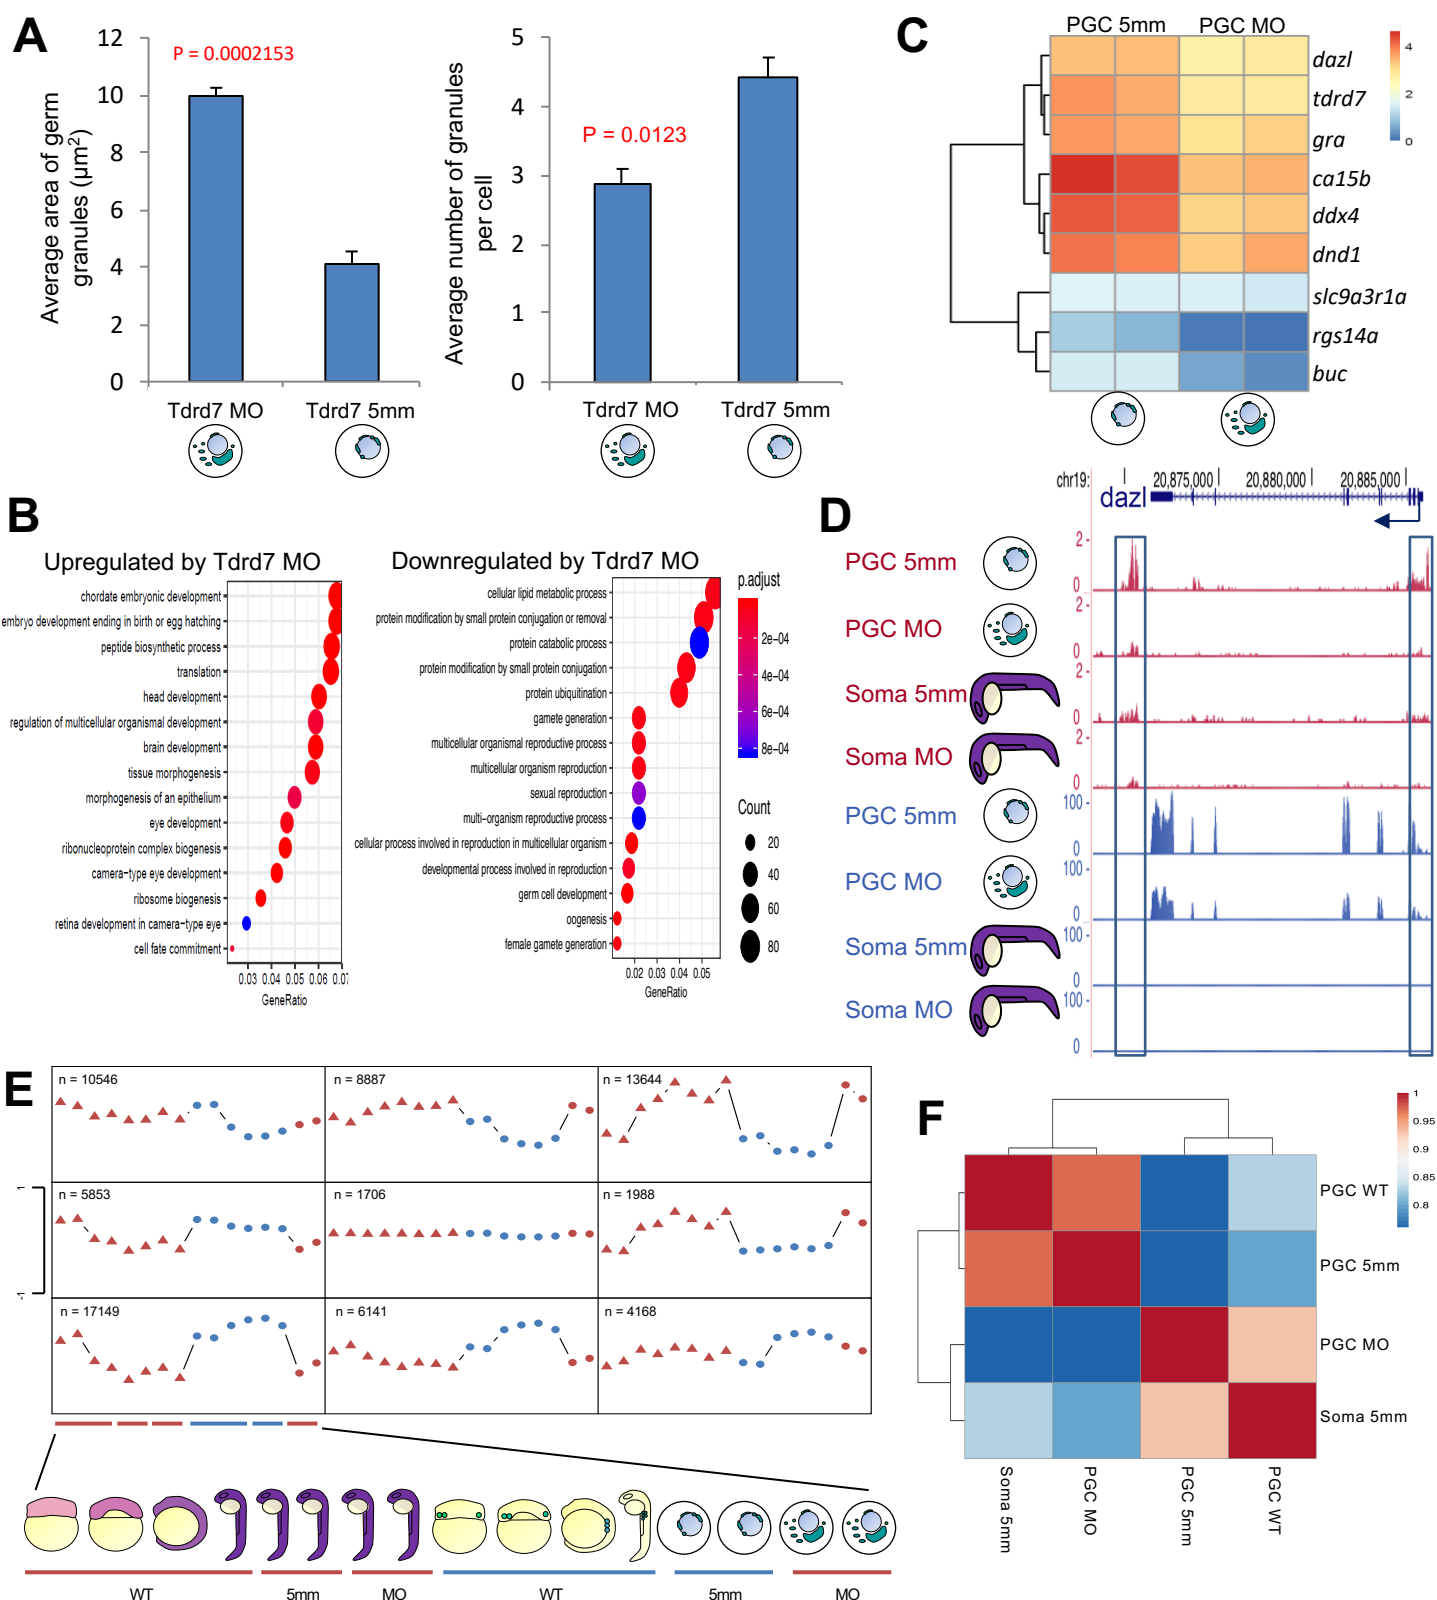

**Supplementary Figure 6. Tdrd7 translation is required for maintaining PGC specification.** (A) Phenotypic effect of Tdrd7 KD PGCs. Number and size of germ granules were measured. P-value against control is shown. Red colour indicates significant difference ( $p < 0.005$ ) based on Wilcoxon test. (B) GO terms for genes upregulated and downregulated by Tdrd7 translational inhibition in PGCs. (C) Gene expression heatmap for germ plasm-localised transcripts. Colour intensities indicate  $\log_2(\text{tpm}+1)$ . (D) Genome browser view of ATAC profiles after morpholino injections. Open chromatin (ATAC-seq) is shown in magenta and normalised transcript levels (RNA-seq) are shown in blue. Arrows show transcriptional directionality. (E) Self-organising map of reproducible open chromatin regions. Wild type (WT) PGCs and somatic cells are represented as circles and triangles respectively. Tdrd7 KD PGCs are shown as red circles. (F) Unsupervised correlation heatmap between wild type (WT) mismatch- and *tdrd7*-targeting morpholinos.
